# Supplementary material for: Splicing the active phases of copper/cobalt-based catalysts achieves high-rate tandem electroreduction of nitrate to ammonia
Source: PubMed Central journal article supplement (PMC8891333; doi:10.1038/s41467-022-28728-4), 2022-03-02
Supplement: 41467_2022_28728_MOESM1_ESM.pdf [file 41467_2022_28728_MOESM1_ESM.pdf]

# Splicing the active phases of copper/cobalt-based catalysts achieves high-rate tandem electroreduction of nitrate to ammonia

Wenhui He<sup>1</sup>, Jian Zhang<sup>1</sup>, Stefan Dieckhöfer<sup>1</sup>, Swapnil Varhade<sup>1</sup>, Ann Cathrin Brix<sup>1</sup>, Anna Lielpetere<sup>1</sup>,  
Sabine Seisel<sup>1</sup>, João R. C. Junqueira<sup>1</sup>, and Wolfgang Schuhmann<sup>1\*</sup>

<sup>1</sup>Analytical Chemistry—Center for Electrochemical Sciences (CES), Faculty of Chemistry and Biochemistry,  
Ruhr University Bochum, Universitätsstr. 150, D-44780 Bochum (Germany)

\* Corresponding authors, e-mail address: [wolfgang.schuhmann@rub.de](mailto:wolfgang.schuhmann@rub.de),

## Supplementary Figures

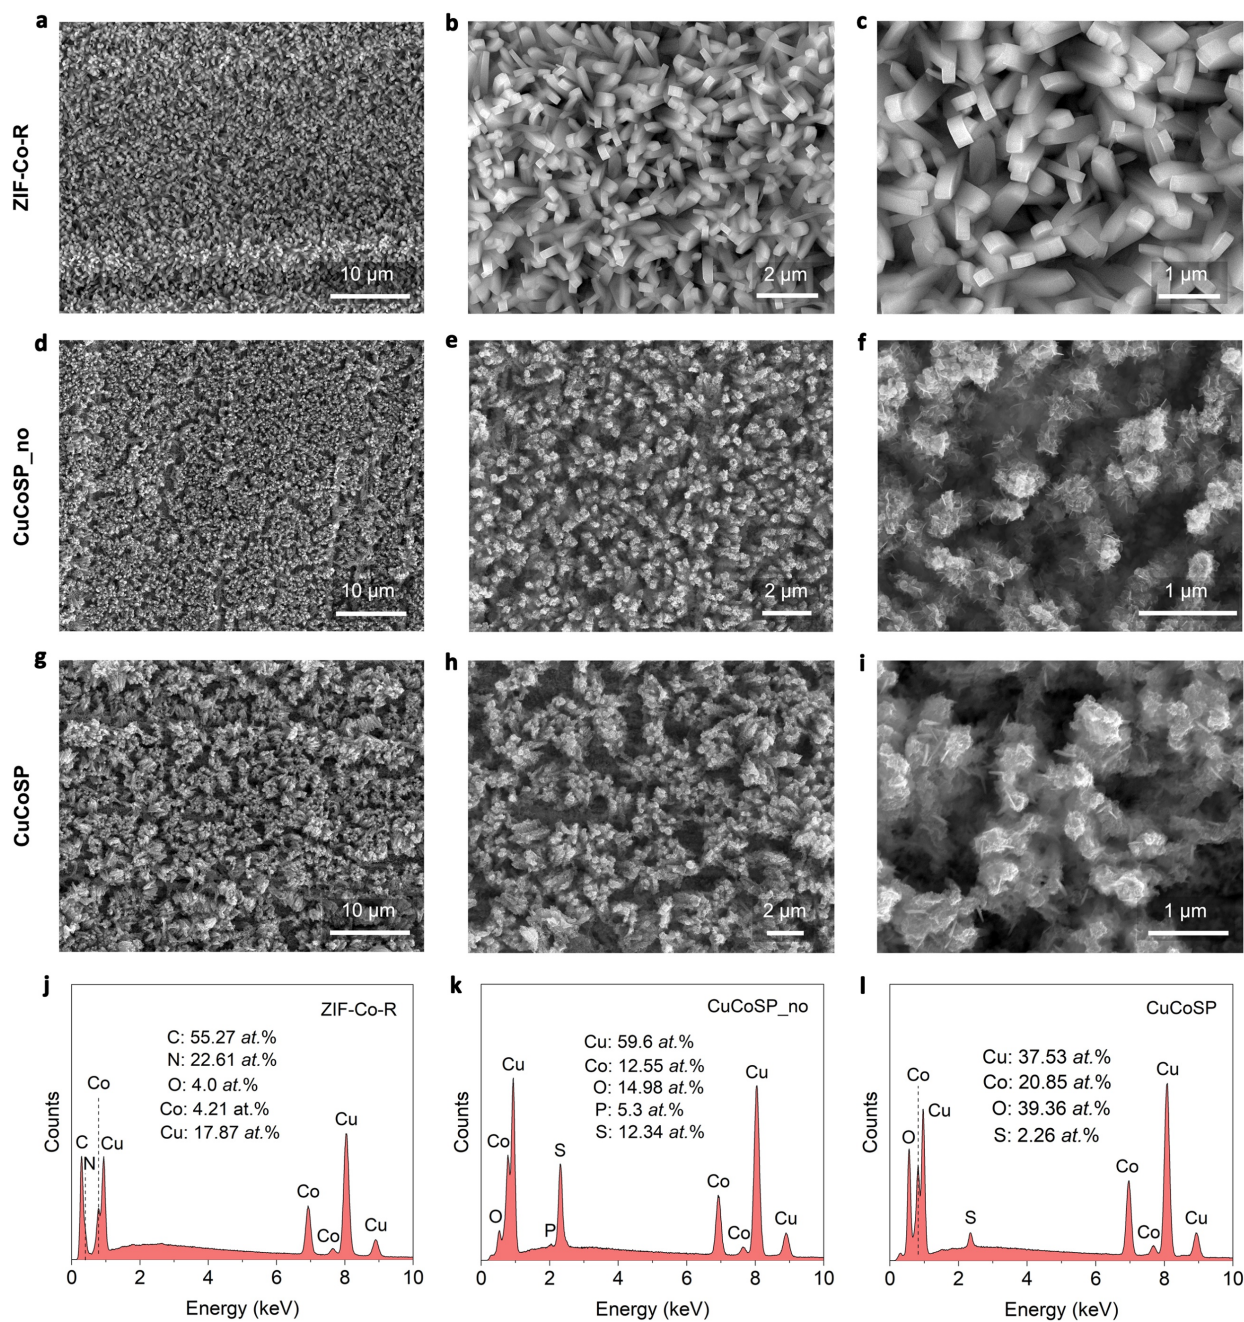

**Supplementary Fig. S1 | Morphology and composition of ZIF-Co-R, CuCoSP\_no and CuCoSP on Cu foils. a-c**, SEM images of ZIF-Co-R nanorods grown on Cu foil with different magnification. **d-f**, SEM images of CuCoSP\_no synthesized by electrochemical conversion of ZIF-Co-R. **g-i**, SEM images of CuCoSP obtained from electrochemical redox activation of CuCoSP\_no. **j-l**, The corresponding energy dispersive X-ray spectroscopy (EDS) of ZIF-Co-R (**j**), CuCoSP\_no (**k**) and CuCoSP (**l**).

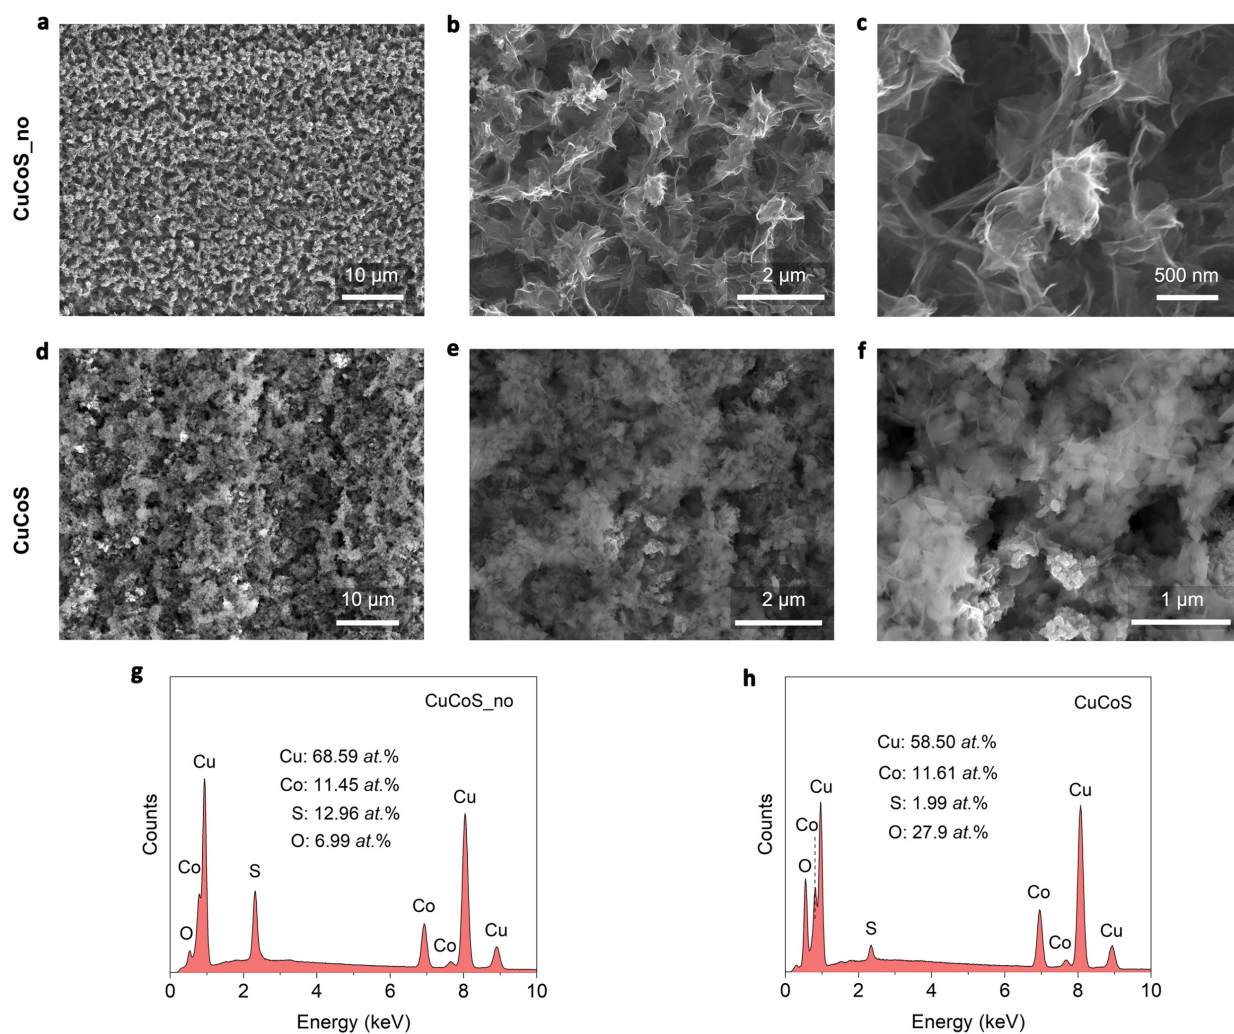

**Supplementary Fig. S2 | Morphology and composition of CuCoS<sub>no</sub> and CuCoS on Cu foils.** **a–c**, SEM images of CuCoS<sub>no</sub> synthesized by electrochemical conversion of ZIF–Co–R on Cu foil without adding 0.05 M Na<sub>2</sub>HPO<sub>4</sub> in the electrolytes. **d–f**, SEM images of CuCoS obtained via electrochemical redox activation of CuCoS<sub>no</sub>. **g, h**, EDS patterns of CuCoS<sub>no</sub> (**g**) and CuCoS (**h**).

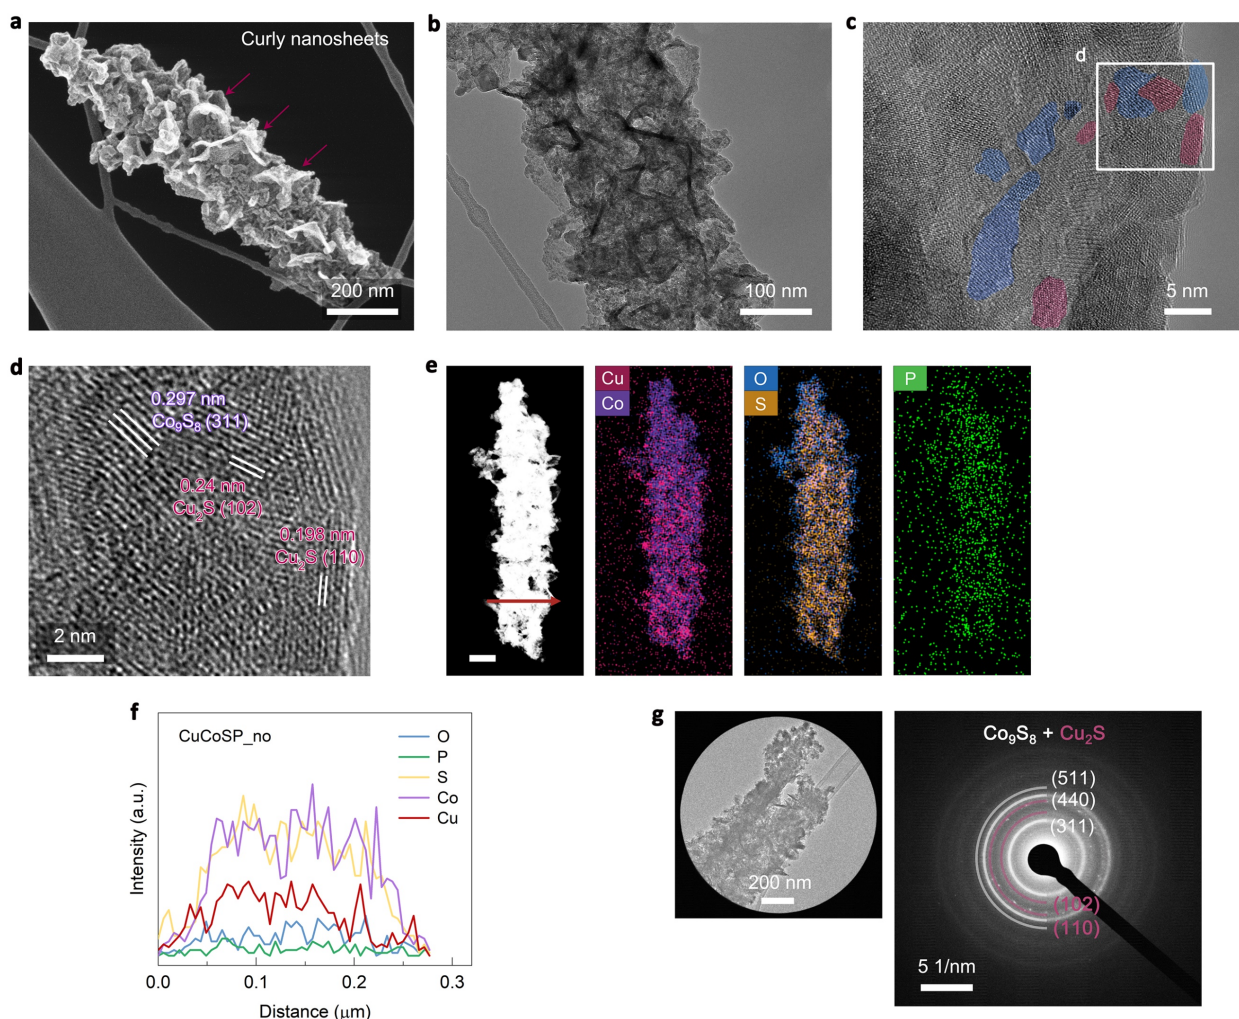

**Supplementary Fig. S3 | Nanostructure and element distribution of CuCoSP\_no.** **a**, A typical high-resolution SEM (HR-SEM) image of CuCoSP\_no, showing the presence of curly nanosheets that correspond to the Cu/Co-based binary metal sulfides. **b–d**, A typical transmission electron microscope (TEM) image and the corresponding high-resolution TEM (HR-TEM) images of CuCoSP\_no. The crystalline lattices reveal the coexistence of  $\text{Co}_9\text{S}_8$  and  $\text{Cu}_2\text{S}$  nanocrystals with a size of about 3–5 nm, as shown in **(c)**. The blue and red colors in **(c)** are marked to guide the eye and correspond to  $\text{Co}_9\text{S}_8$  and  $\text{Cu}_2\text{S}$  nanocrystals, respectively. **e, f**, EDX mapping **(e)** and EDX linear scan **(f)** of the area marked by the red arrow in **(e)**. Scale bar in **(e)** is 100 nm. **g**, Selected area electron-diffraction (SAED) patterns of CuCoSP\_no.

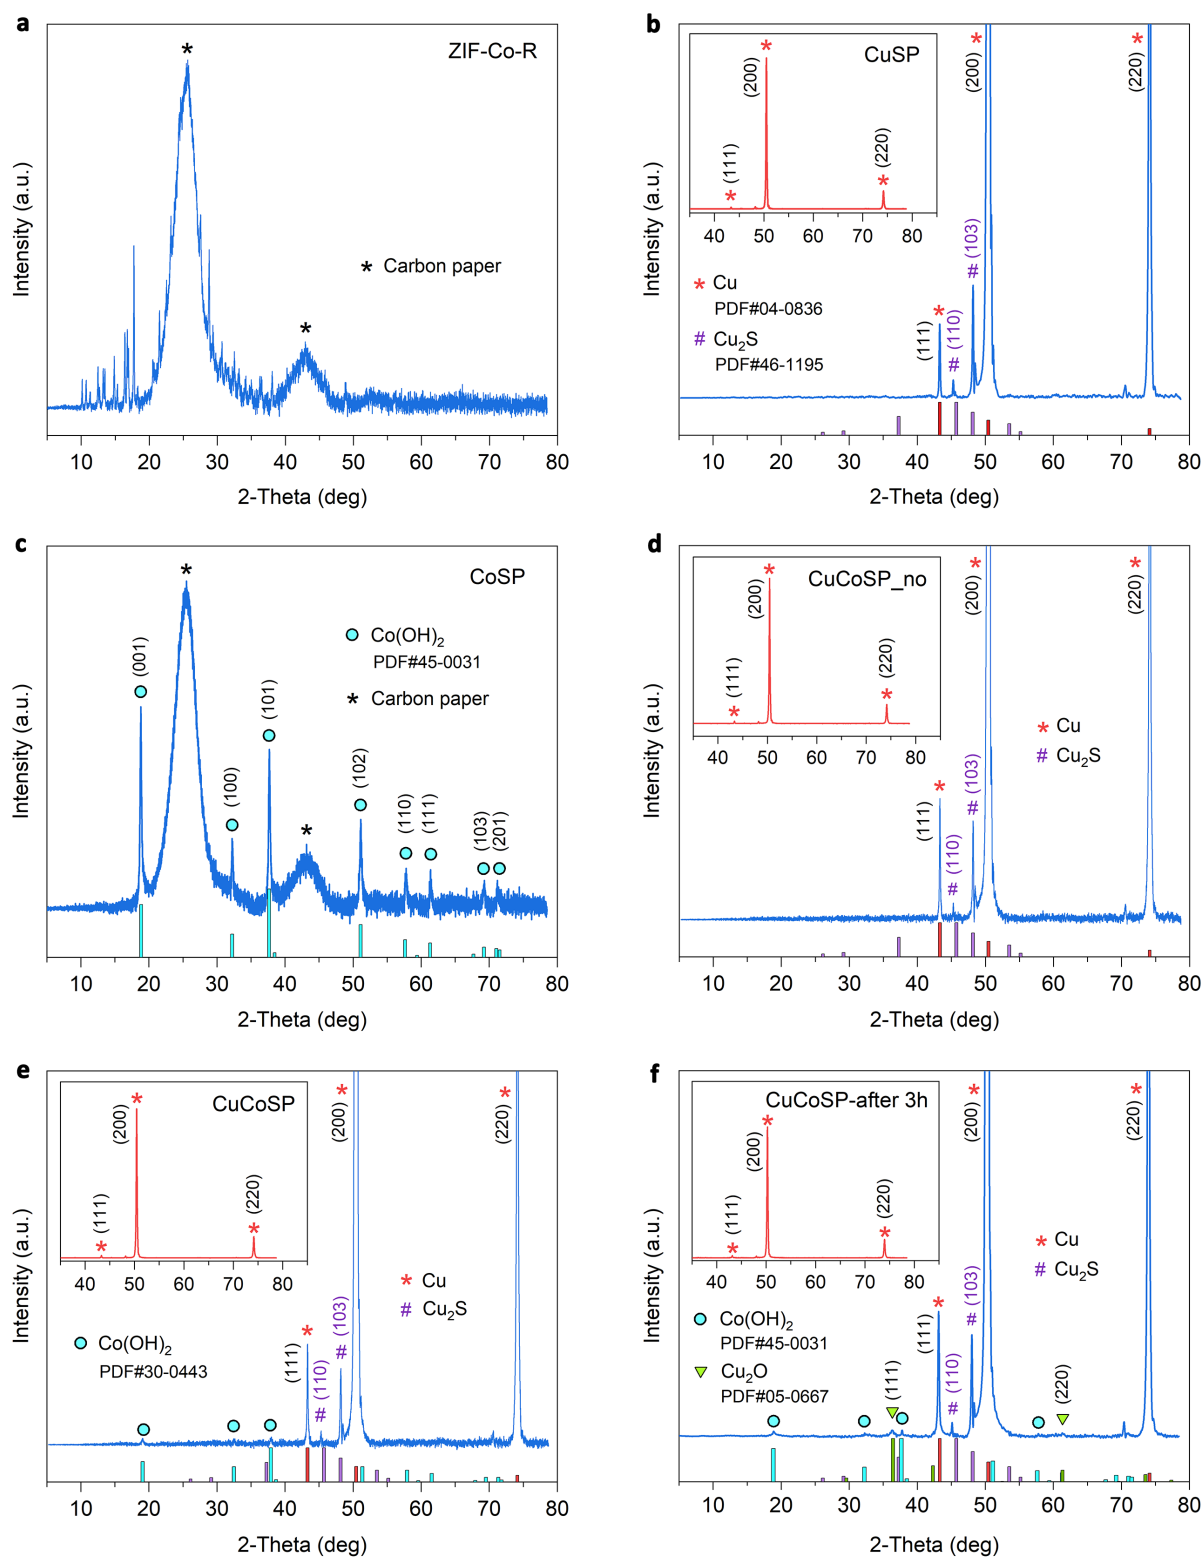

**Supplementary Fig. S4 | X-ray diffraction (XRD) patterns of the samples. a**, ZIF-Co-R on carbon paper. **b**, CuSP on Cu foil. **c**, CoSP on carbon paper. **d**, CuCoSP\_no Cu foil. **e**, CuCoSP on Cu foil. **f**, CuCoSP on Cu foil after repeating three electrolysis of one hour at  $-0.325$  V. All the samples on Cu foils show preferential exposure of the Cu (200) facet, as well as two peaks related to Cu<sub>2</sub>S. The latter suggest that there is a stable Cu<sub>2</sub>S phase in the Cu foil substrate, which should be produced during the EC-MOF process.

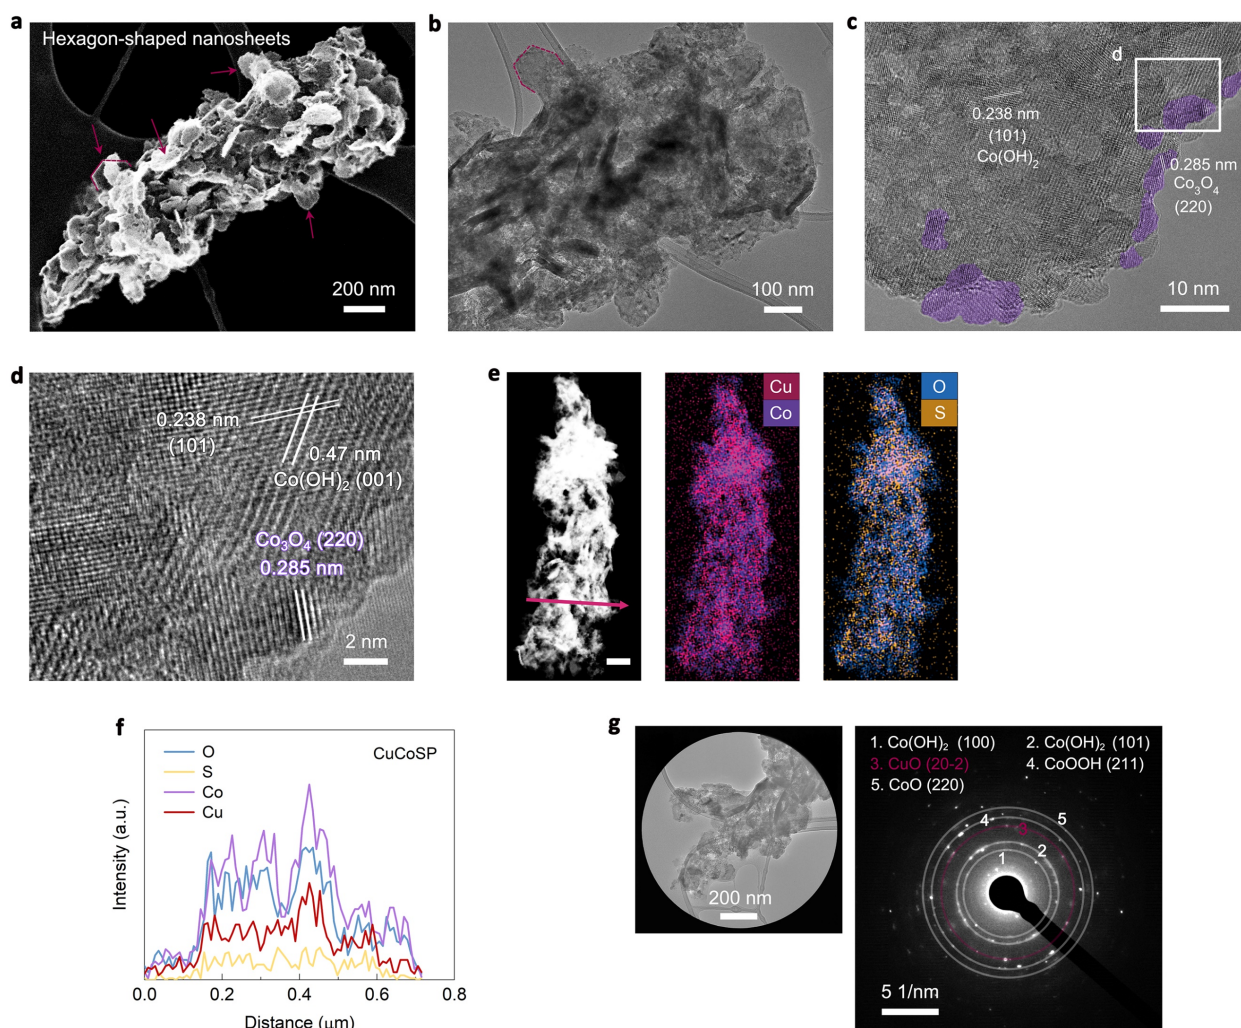

**Supplementary Fig. S5 | Nanostructure and element distribution of CuCoSP.** **a**, A typical HR-SEM image of CuCoSP, showing a contour assembled by hexagon-shaped nanosheets, a typical feature of Co-based hydroxides. **b-d**, TEM and HR-TEM images of a hexagon-shaped nanosheet on CuCoSP. The crystalline lattices suggest that the hexagon-shaped nanosheets are mainly composed of  $\text{Co(OH)}_2$  with few  $\text{Co}_3\text{O}_4$  nanocrystals mainly distributing at the edge, as shown in **(c)**. The purple colors in **(c)** are marked to guide the eye and correspond to the  $\text{Co}_3\text{O}_4$  nanocrystals. **e, f**, EDX mapping **(e)** and linear scan **(f)** of the area marked by the red arrow in **(e)**. Scale bar in **(e)** is 200 nm. **g**, SAED patterns of CuCoSP.

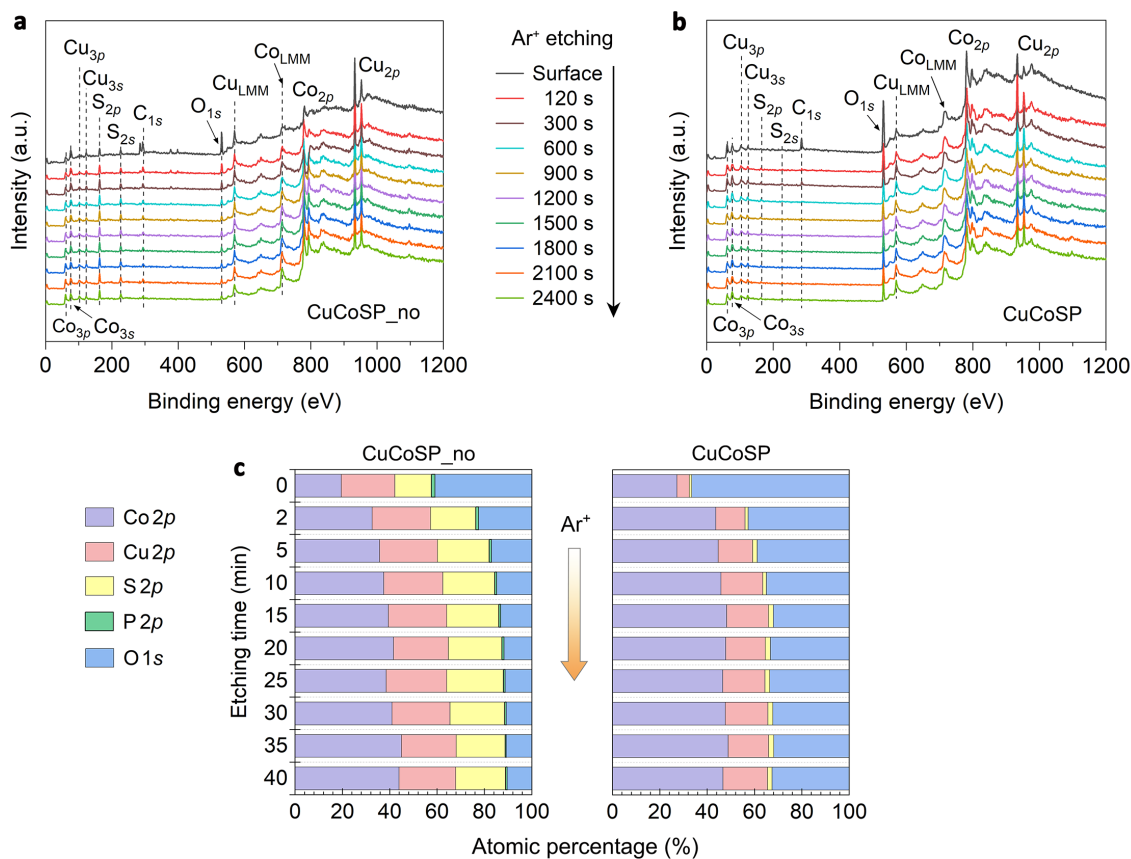

**Supplementary Fig. S6 | Depth-profiling X-ray photoelectron spectroscopies (XPS) of CuCoSP\_no and CuCoSP. a, b, XPS spectra of CuCoSP\_no (a) and CuCoSP (b) as a function of Ar<sup>+</sup> etching time. c, XPS-determined atomic percentage–depth profile of CuCoSP\_no and CuCoSP as a function of Ar<sup>+</sup> etching time.**

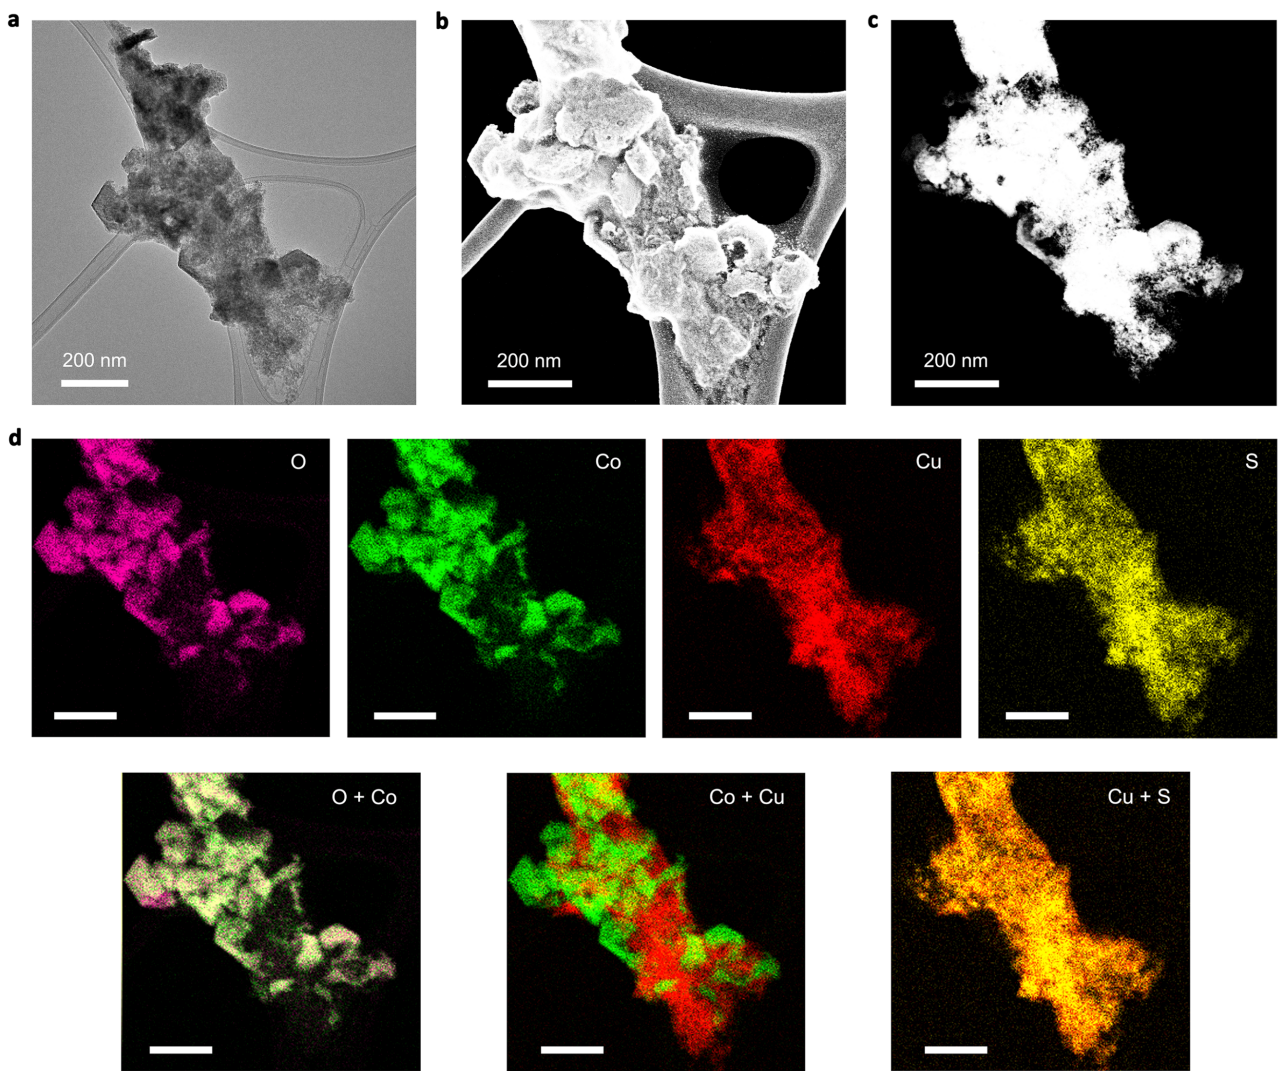

**Supplementary Fig. S7 | Phase separation in CuCoSP<sub>no</sub> after electrochemical redox activation.** a–d, TEM (a), HR-SEM (b), HAADF-STEM (c) and EDX mapping (d) images of CuCoSP<sub>no</sub> after redox activation. Scale bar in (d) is 200 nm. The complete overlapping of O and Co, as well as Cu and residual S elements, suggest that the cobalt sulfide phases are easier to be oxidized than the copper sulfide phases during the redox activation, leading to the separation of Co-based and Cu-based phases, as well as the formation of rich phase interfaces.



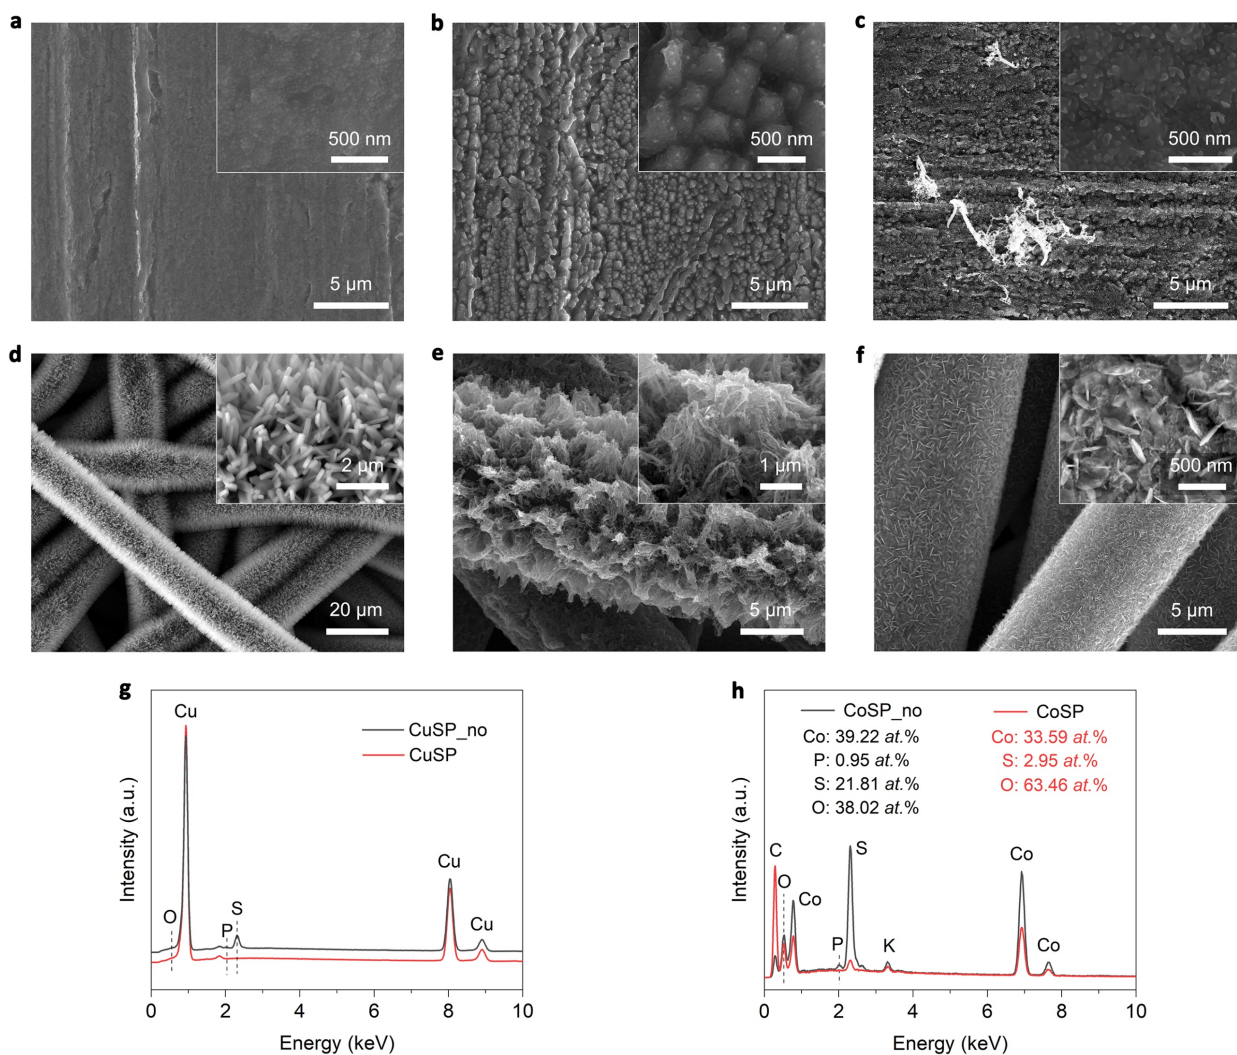

**Supplementary Fig. S8 | Morphology and composition of CuSP\_no, CuSP, CoSP\_no and CoSP.** a–c, Typical SEM images of a Cu foil substrate (a), CuSP\_no (b), and CuSP (c). d–f, Typical SEM images of Co-ZIF-R on carbon papers (d), CoSP\_no (e), and CoSP (f). The insets show the corresponding SEM images with higher magnification. g, EDS spectra of CuSP\_no and CuSP. h, EDS spectra of CoSP\_no and CoSP.

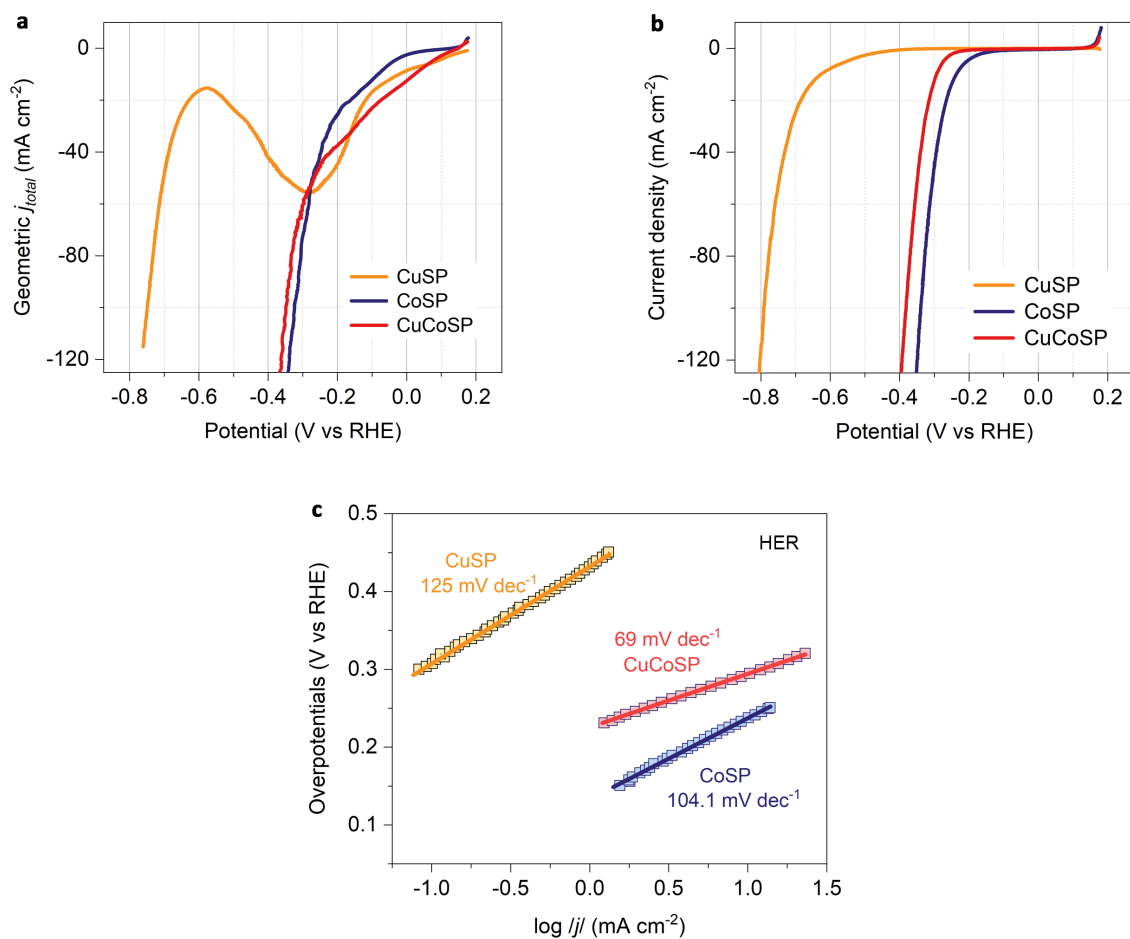

**Supplementary Fig. S9 | Linear sweep voltammograms (LSV) tests of CuSP, CoSP and CuCoSP. a–b**, LSV curves of CuSP, CoSP and CuCoSP in 0.1 M KOH (pH 13) electrolytes with 0.01 M  $\text{NO}_3^-$  (**a**) and without  $\text{NO}_3^-$  (**b**). The LSVs in (**b**) show the  $\text{H}_2$ -evolving activities (HER) of the catalysts in 0.1 M KOH. **c**, Tafel slopes of the catalysts for HER in 0.1 M KOH. The LSV curves were recorded at a scan rate of  $5 \text{ mV s}^{-1}$ .

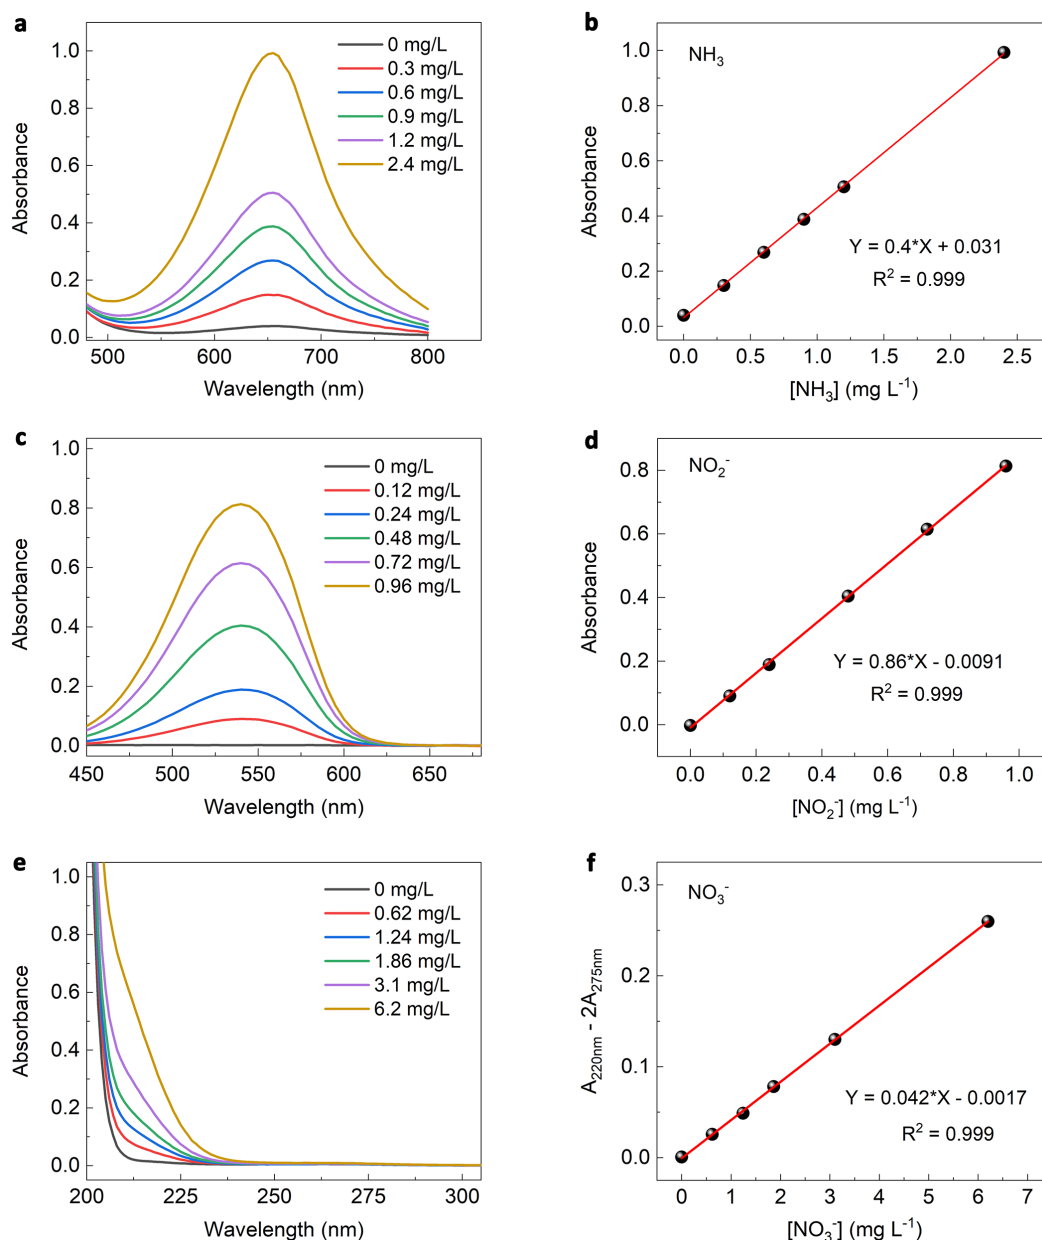

**Supplementary Fig. S10 |  $\text{NH}_3$ ,  $\text{NO}_2^-$  and  $\text{NO}_3^-$  quantification using UV-vis absorption spectroscopy.** **a, b**, UV-vis absorption spectra and corresponding calibration curve for the  $\text{NH}_3$  assay using the indophenol blue method. **c, d**, UV-vis absorption spectra and corresponding calibration curve for the  $\text{NO}_2^-$  assay. **e, f**, UV-vis absorption spectra and corresponding calibration curve for the  $\text{NO}_3^-$  assay.

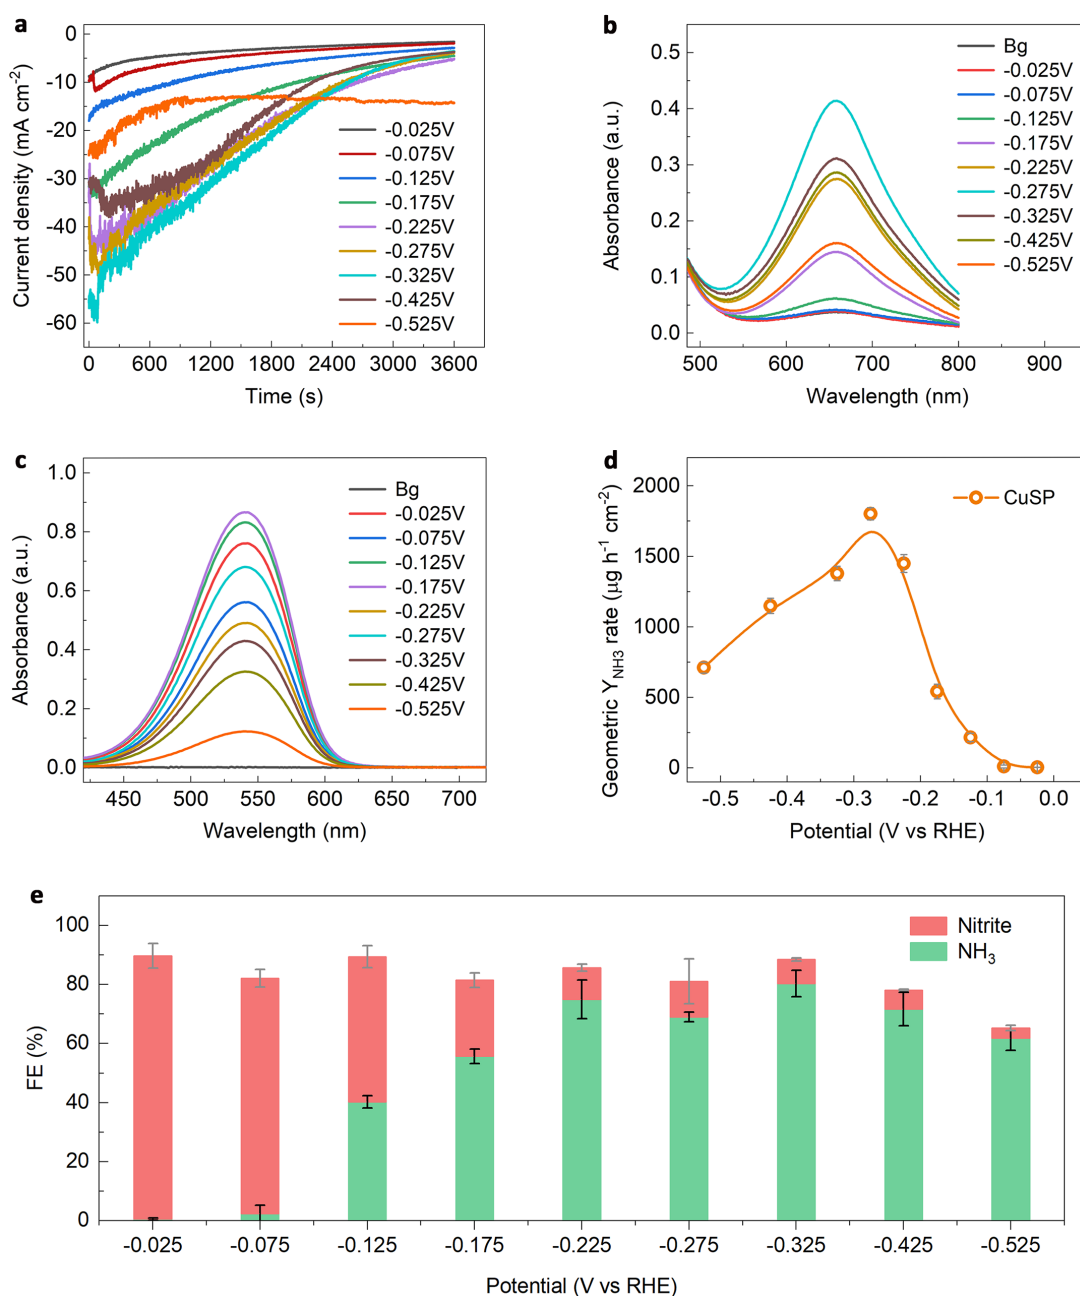

**Supplementary Fig. S11 | NH<sub>3</sub> synthesis performance of CuSP at a series of potentials.** **a**, Chronoamperometry curves at different potentials for 1 h in 0.1 M KOH and 0.01 M NO<sub>3</sub><sup>-</sup>. **b**, **c**, UV-vis absorption spectrum of NH<sub>3</sub> (**b**) and NO<sub>2</sub><sup>-</sup> (**c**) measurements. Note that to detect the NH<sub>4</sub><sup>+</sup>, the post-electrolysis electrolytes at -0.025 V and -0.075 V were diluted 6 times, while at the other electrolysis potentials, the electrolytes were diluted 30 times. As for the NO<sub>2</sub><sup>-</sup> tests, the electrolytes at all the potentials were diluted 50 times. Background (Bg) signals were recorded using 0.1 M KOH. **d**, NH<sub>3</sub> yield rate (Y<sub>NH<sub>3</sub></sub>) of CuSP defined by the geometric area of electrodes. **e**, Faradaic efficiency (FE) of NH<sub>3</sub> and NO<sub>2</sub><sup>-</sup>. Error bars denote the standard deviations of Y<sub>NH<sub>3</sub></sub> and FE calculated from three independent samples.

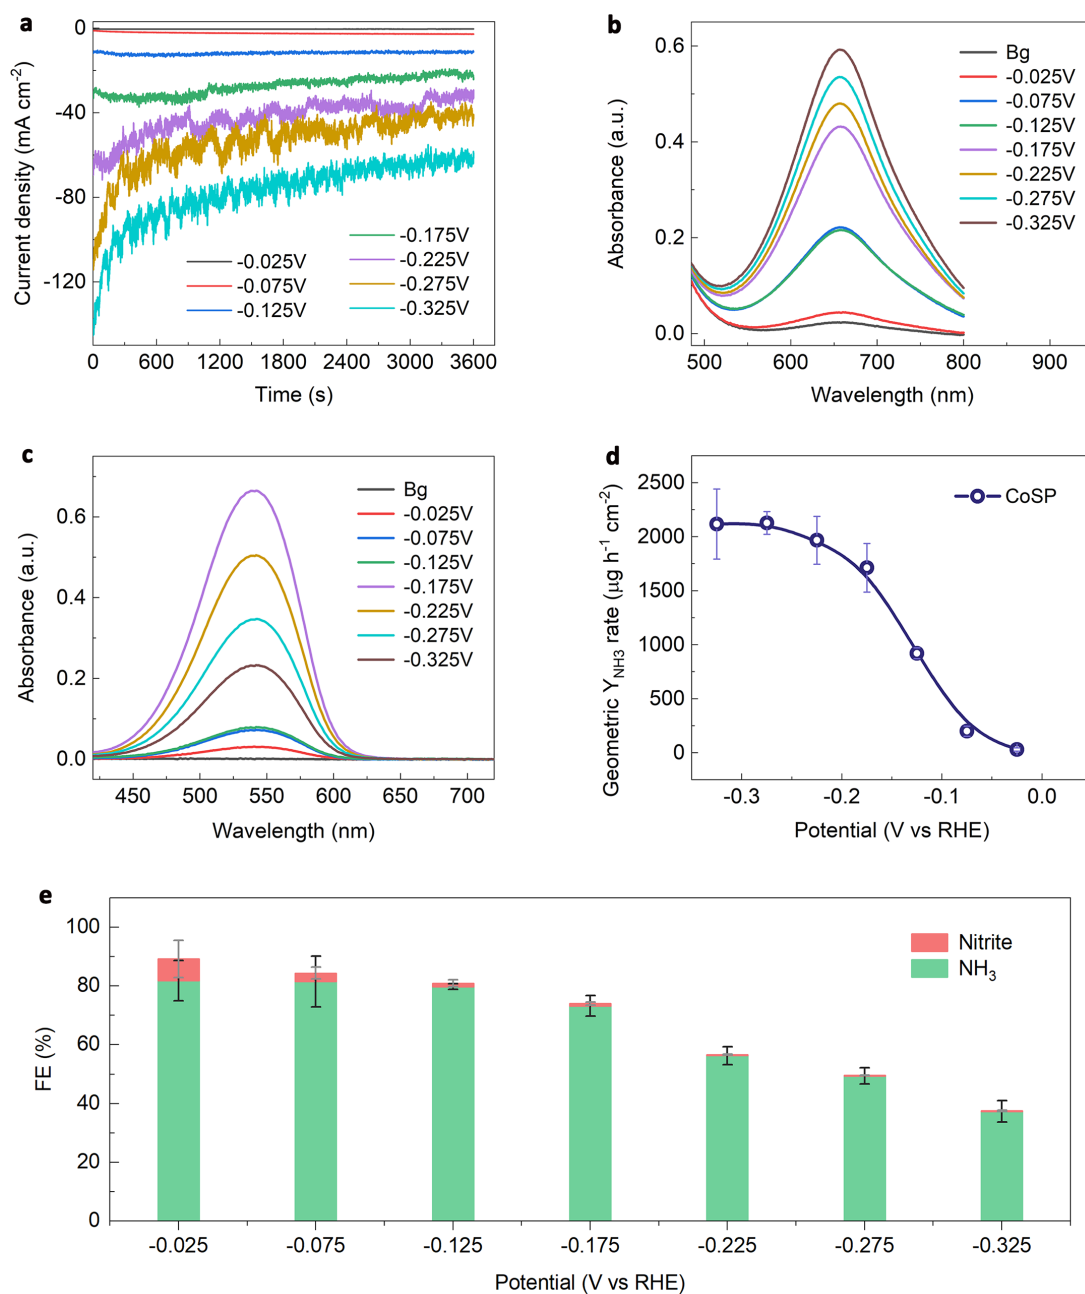

**Supplementary Fig. S12 | NH<sub>3</sub> synthesis performance of CoSP at a series of potentials.** **a**, Chronoamperometry curves at different potentials for 1 h in 0.1 M KOH and 0.01 M NO<sub>3</sub><sup>-</sup>. **b**, **c**, UV-vis absorption spectrum of NH<sub>3</sub> (**b**) and NO<sub>2</sub><sup>-</sup> (**c**) measurements. Note that to detect the NH<sub>4</sub><sup>+</sup>, the post-electrolysis electrolytes at -0.025 V and -0.075 V were diluted 6 times, while the electrolytes obtained at the other potentials were diluted 30 times. As for the NO<sub>2</sub><sup>-</sup> tests, the electrolytes obtained at all the potentials were diluted 5 times. Background (Bg) signals were recorded using 0.1 M KOH. **d**, Y<sub>NH<sub>3</sub></sub> of CoSP defined by the geometric area of electrodes. **e**, FE of NH<sub>3</sub> and NO<sub>2</sub><sup>-</sup>. Error bars denote the standard deviations of Y<sub>NH<sub>3</sub></sub> and FE calculated from three independent samples.

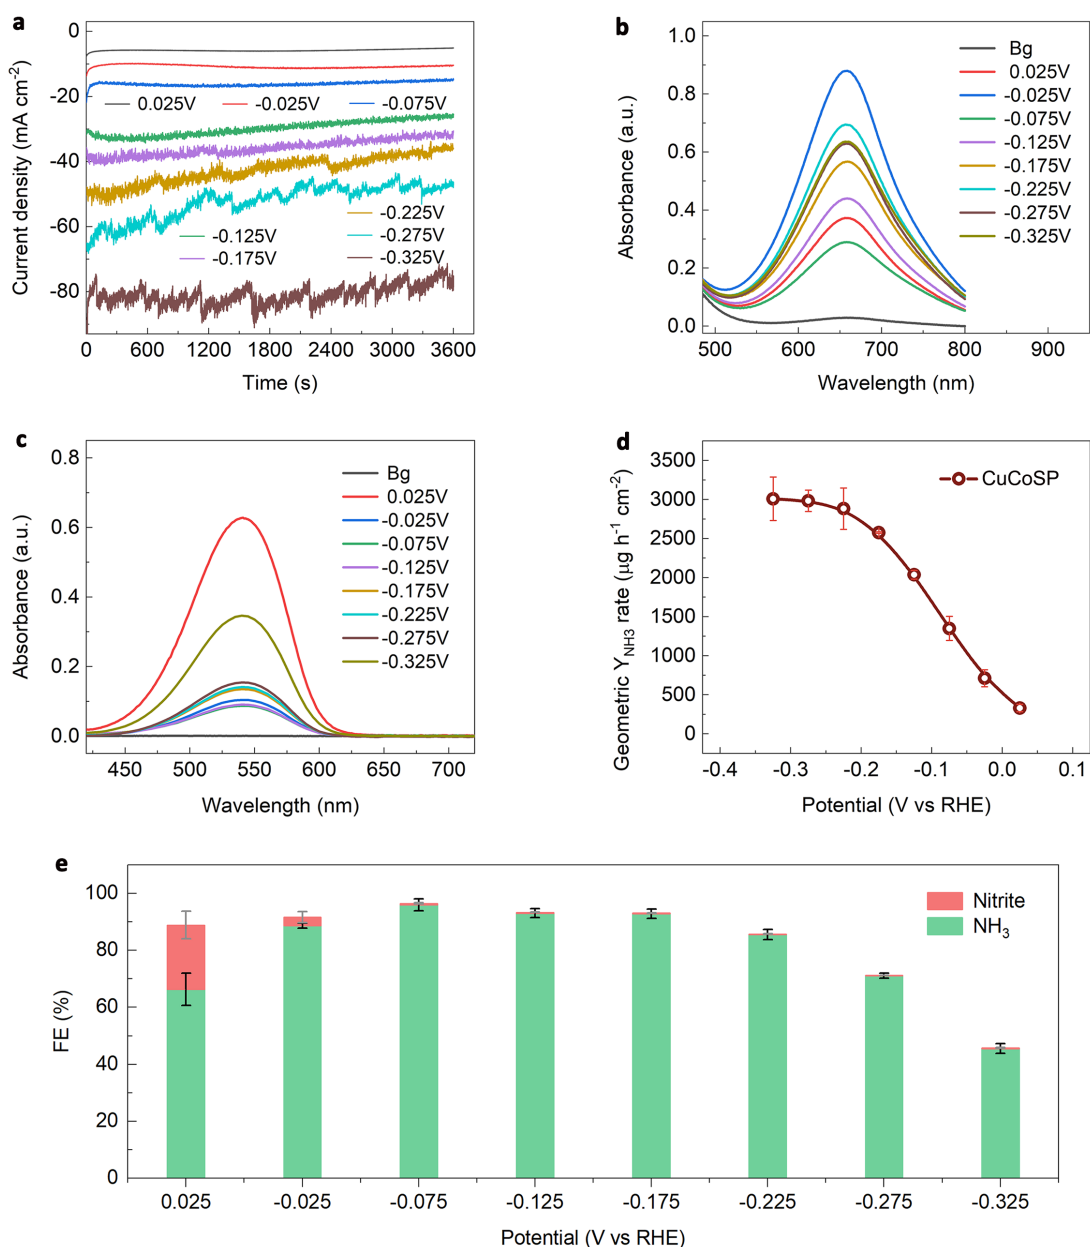

**Supplementary Fig. S13 | NH<sub>3</sub> synthesis performance of CuCoSP at a series of potentials.** **a**, Chronoamperometry curves at different potentials for 1 h in 0.1 M KOH and 0.01 M NO<sub>3</sub><sup>-</sup>. **b**, **c**, UV-vis absorption spectrum of NH<sub>3</sub> (**b**) and NO<sub>2</sub><sup>-</sup> (**c**) measurements. Note that to detect the NH<sub>4</sub><sup>+</sup>, the post-electrolysis electrolytes at 0.025 V and -0.025 V were diluted 6 times, while the electrolytes obtained at the other electrolysis potentials were diluted 30 times. As for the NO<sub>2</sub><sup>-</sup> tests, the electrolytes obtained at all the electrolysis potentials were diluted 5 times. Background (Bg) signals were recorded using 0.1 M KOH. **d**, Y<sub>NH<sub>3</sub></sub> yield rate of CuCoSP defined by the geometric area of electrodes. **e**, FE of NH<sub>3</sub> and NO<sub>2</sub><sup>-</sup>. Error bars denote the standard deviations of Y<sub>NH<sub>3</sub></sub> and FE calculated from three independent samples.

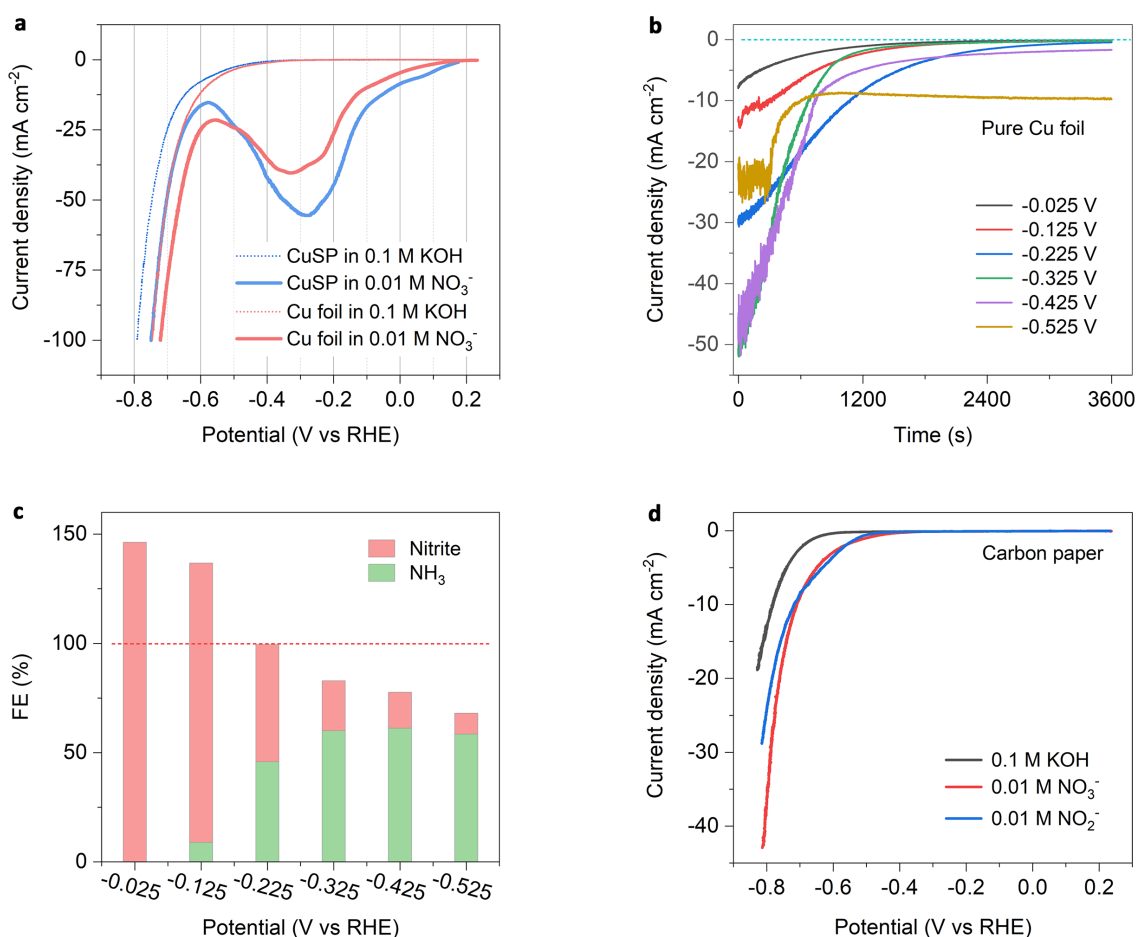

**Supplementary Fig. S14 | Activity of pure Cu foil and carbon paper for the NO<sub>3</sub>RR.** **a**, Comparison of LSVs recorded on CuSP and Cu foil in 0.1 M KOH in presence and absence of 0.01 M NO<sub>3</sub><sup>-</sup>. **b**, Chronoamperometry for 1 h of a Cu foil at different potentials in 0.1 M KOH and 0.01 M NO<sub>3</sub><sup>-</sup>. **c**, FE of NH<sub>3</sub> and NO<sub>2</sub><sup>-</sup> for Cu foil after one-hour electrolysis at different potentials. **d**, LSVs of carbon paper in 0.1 M KOH with 0.01 M NO<sub>3</sub><sup>-</sup>, NO<sub>2</sub><sup>-</sup>, or in 0.1 M KOH. LSVs in **(a)** and **(d)** were recorded at a scan rate of 5 mV s<sup>-1</sup>.

The pure Cu foil has a smooth surface and shows a low electrochemical capacitance (0.126 mF cm<sup>-2</sup>) (supplementary **Fig. S8a** and **S17**). The Cu foil shows almost the same features of LSV curves for the NO<sub>3</sub>RR as the CuSP catalysts, except for lower current densities. However, the Cu foil exhibits a stable NO<sub>3</sub>RR activity only at a potential of -0.525 V, which is the same as for the CuSP. At potentials >-0.425 V (vs RHE), the NO<sub>3</sub>RR activity of the Cu foil deactivated much more rapidly than that of the CuSP catalyst. The final activity (indicated by the current density) of the Cu foil after one-hour electrolysis is only 5–10% of that of the CuSP activity. This result can be partially explained by the ~17 times smaller ECSA of the Cu foil compared to the CuSP catalysts (supplementary **Fig. S17**). However, as shown in supplementary **Fig. S14c** the Cu foil shows an over 100% FE for NO<sub>3</sub>RR at -0.025 V (146 %) and -0.125 V (137 %), with the NO<sub>2</sub><sup>-</sup> as the sole or main product, respectively. This result suggests that there is a chemical pathway for NO<sub>2</sub><sup>-</sup> formation during electrolysis; i.e., NO<sub>3</sub><sup>-</sup> is first electrochemically reduced to NO<sub>2</sub> (one electron transfer), and then the highly oxidative NO<sub>2</sub> species are chemically reduced to NO<sub>2</sub><sup>-</sup> by metallic Cu (one electron transfer)<sup>1</sup>, resulting in the formation of Cu oxides in alkaline media. This chemical pathway offers additional electrons for the NO<sub>3</sub>RR, thus enabling an over 100% FE.

The comparison of the performance of Cu foil and CuSP for the NO<sub>3</sub>RR provides two important hints: 1) pure metallic catalysts may play a role of chemical reducing reagents for promoting the NO<sub>3</sub>RR, especially at low overpotentials where NO<sub>2</sub> will be easily produced<sup>1</sup>, 2) the presence of CuO<sub>x</sub> phases in CuSP can help to accelerating the direct reduction of NO<sub>3</sub><sup>-</sup> to NO<sub>2</sub><sup>-</sup> and in turn decrease the formation of oxidative NO<sub>2</sub> species, as supported by the FE of CuSP for the NO<sub>3</sub>RR (supplementary **Fig. S11**).

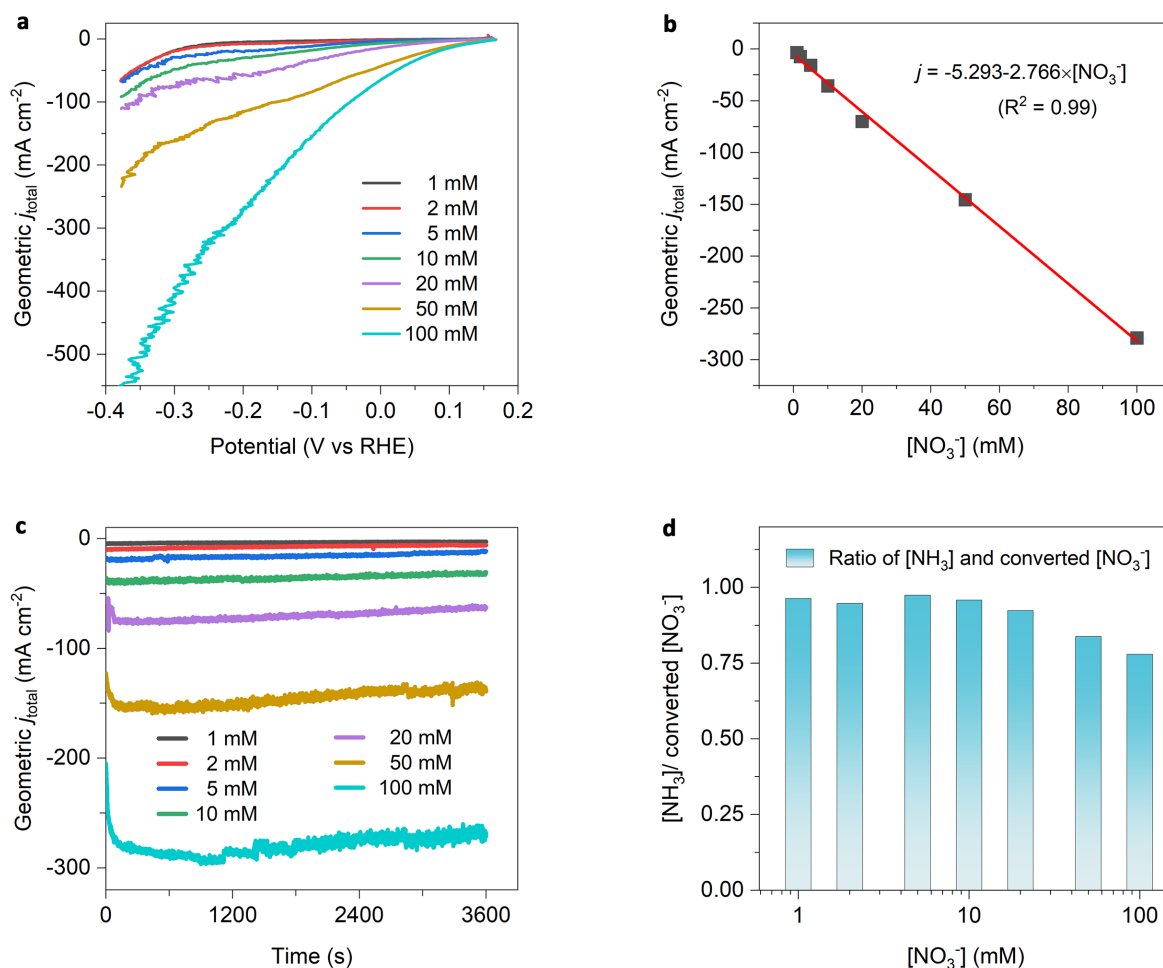

**Supplementary Fig. S15 | Electrocatalytic tests of CuCoSP in different concentrations of  $NO_3^-$ .** **a**, LSVs of CuCoSP in 0.1 M KOH containing different concentrations of  $NO_3^-$  at a scan rate of  $5 \text{ mV s}^{-1}$ . **b**, Plots of the total current densities (defined by the geometric area of CuCoSP electrodes) at  $-0.175 \text{ V}$  (vs. RHE) against the  $NO_3^-$  concentrations ( $[NO_3^-]$ ). The  $NO_3^-$  reduction over CuCoSP follows a first reaction order with respect to  $[NO_3^-]$ . **c**, Chronoamperometry curves of CuCoSP under different  $[NO_3^-]$  at  $-0.175 \text{ V}$  (vs. RHE). **d**, The turnover numbers (TON) of nitrate on CuCoSP, defined by the ratio of the formed  $NH_3$  concentration  $[NH_3]$  to the converted  $NO_3^-$  concentration  $[NO_3^-]$ , which were estimated after one-hour electrolysis at  $-0.175 \text{ V}$  in electrolytes containing different  $[NO_3^-]$ . Note that the TON values decrease down to  $\sim 0.8$  at  $[NO_3^-] > 20 \text{ mM}$ , indicating that high  $[NO_3^-]$  modulate the pathways of  $NO_3^-$  reduction on CuCoSP electrocatalysts, resulting in the formation of gaseous by-products (i.e.  $N_2$  and  $NO_x$ ).



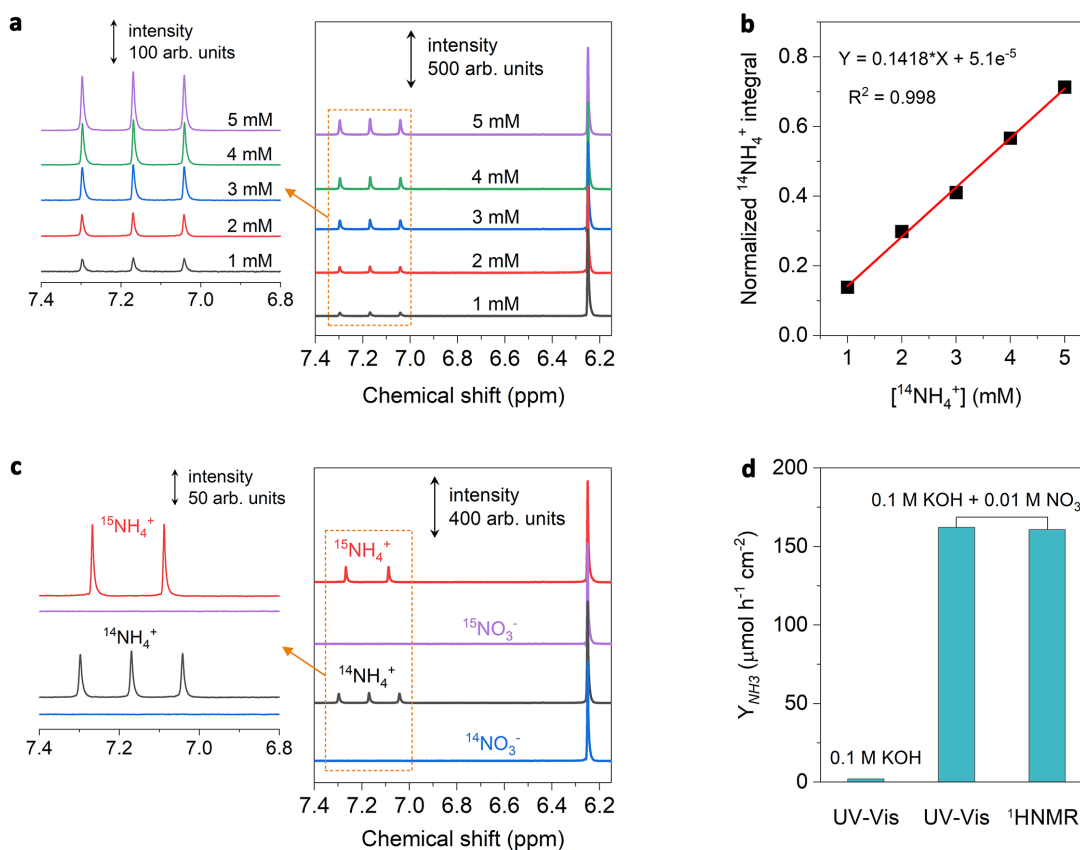

**Supplementary Fig. S16 |  $^{15}\text{NH}_4^+$  detection and  $^{14}\text{NH}_4^+$  quantification by  $^1\text{H}$  NMR spectra.** **a**,  $^1\text{H}$  NMR spectra of  $^{14}\text{NH}_4^+$  ions with different concentrations. Maleic acid with a constant concentration was used as an external standard with a proton signal at  $\delta = 6.25$  ppm. **b**, Calibration curve for  $^{14}\text{NH}_4^+$  detection using  $^1\text{H}$  NMR, where  $^{14}\text{NH}_4^+$  peak area integrals were normalized to that of maleic acid. The normalized peak area integral of  $^{14}\text{NH}_4^+$  is positively correlated to the concentrations of  $^{14}\text{NH}_4^+$  [ $^{14}\text{NH}_4^+$ ]. **c**,  $^1\text{H}$  NMR spectra of the electrolytes after electrocatalysis using 0.01 M  $^{15}\text{NO}_3^-$  or 0.01 M  $^{14}\text{NO}_3^-$  in 0.1 M KOH as nitrogen source.  $^1\text{H}$  NMR of the fresh electrolytes without going through electrocatalysis (marked as  $^{15}\text{NO}_3^-$  and  $^{14}\text{NO}_3^-$ ) were provided as controls, showing no background signals of ammonia. **d**, Comparison of the ammonia yield rate over CuCoSP quantified by the UV-Vis spectra and  $^1\text{H}$  NMR. The electrolysis was carried out at  $-0.175$  V (vs. RHE) for one hour in 0.1 M KOH with and without 0.01 M  $^{14}\text{NO}_3^-$ .

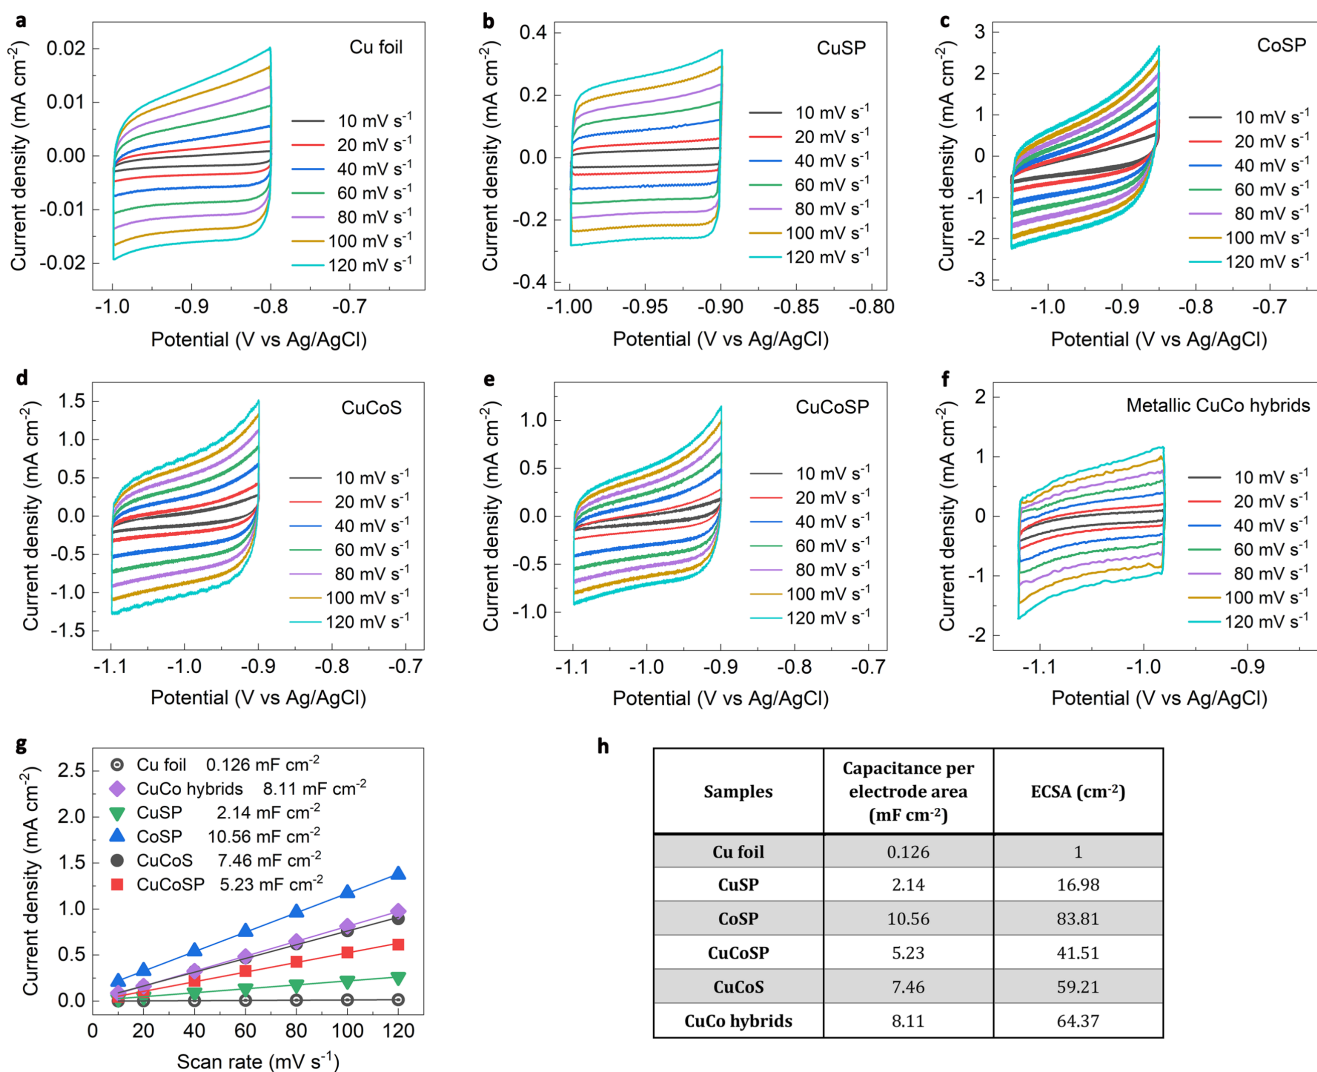

**Supplementary Fig. S17 | Cyclic voltammograms (CV) for the determination of the double-layer capacitance of different samples in Ar-saturated 0.1 M KOH. a, Cu foil, b, CuSP. c, CoSP. d, CuCoS. e, CuCoSP. f, Metallic CuCo hybrids. g, Plots of the current densities against CV scan rates. The slope is correlated with the electrochemical double-layer capacitance per geometric area of the electrode and shows also a correlation to the electrochemical surface area (ECSA). h, A table of the double-layer capacitance derived ECSA, where the ECSA of a smooth Cu foil is defined to be 1 cm<sup>2</sup> and the ECSA of the other samples is derived from their double-layer capacitance per geometric electrode area.**

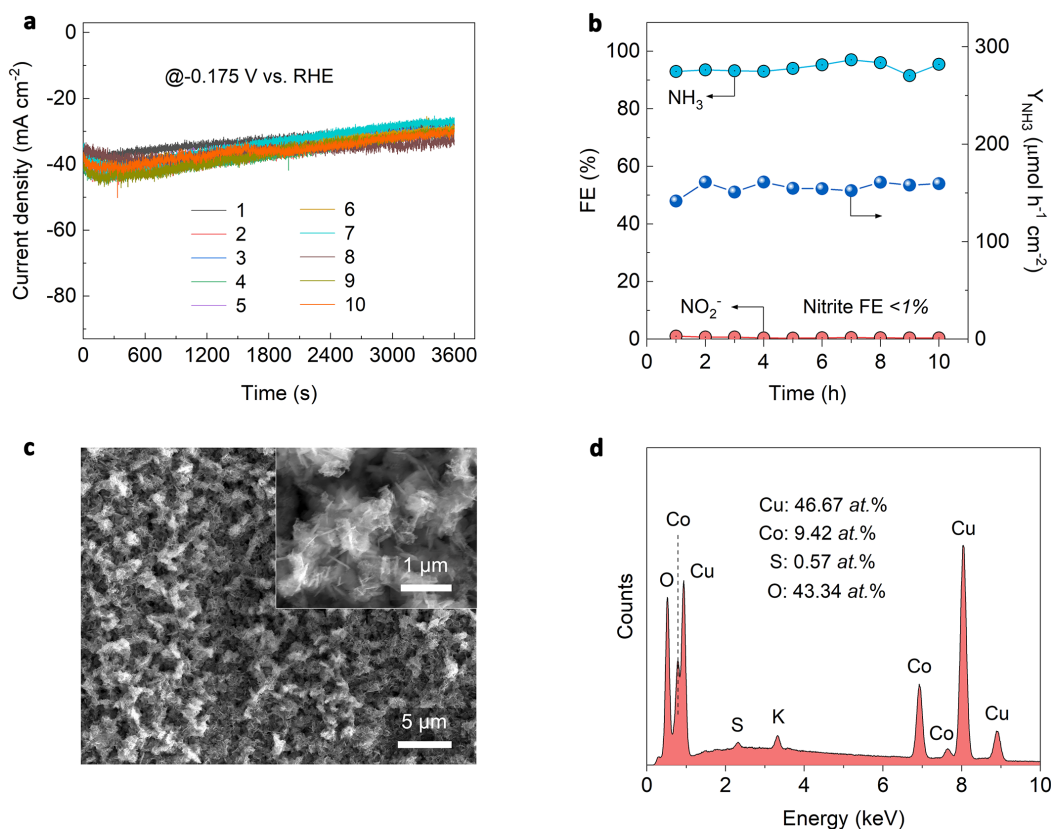

**Supplementary Fig. S18 | Stability tests of CuCoSP for ammonia synthesis carried out via repeating one-hour electrolysis for ten times at  $-0.175$  V (vs. RHE).** **a**, Chronoamperometry curves of CuCoSP at different time periods. **b**, Faradaic efficiency and  $\text{NH}_3$  yield rate summed by ten independent one-hour tests at  $-0.175$  V. **c**, SEM images of CuCoSP after the stability tests. **d**, EDS patterns of CuCoSP after the stability tests.

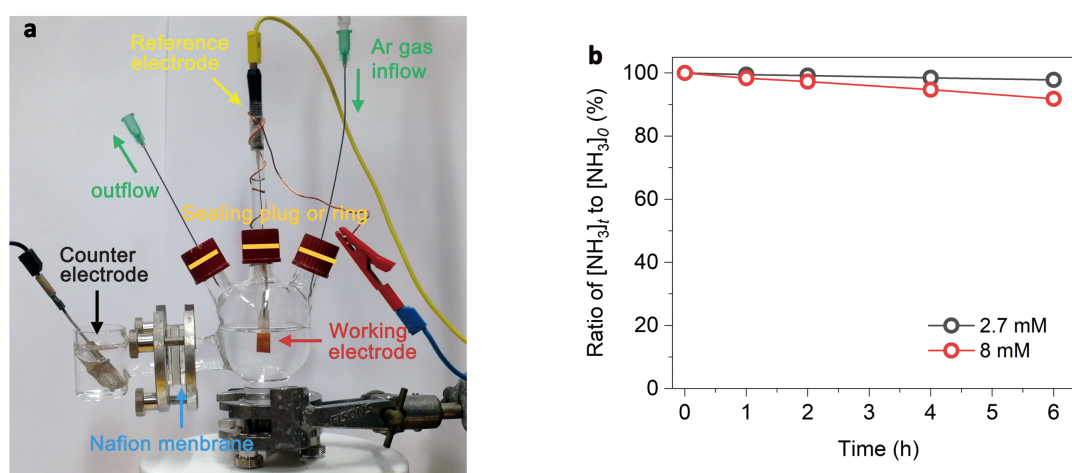

**Supplementary Fig. S19 | Ammonia volatilization in the 0.1 M KOH (pH 13) with time.** **a**, Photograph of the H-type cell used in this study. **b**, Change of ammonia concentrations with time. The solution is in the H-type cell under stirring (300 rpm) and Ar flow ( $10 \text{ ml min}^{-1}$ ). The initial concentrations of ammonia at  $t = 0$  ( $[\text{NH}_3]_0$ ) are 2.7 mM and 8 mM, which correspond to the ammonia yield on CuCoSP after 1 h electrolysis in 0.01 M and 0.1 M nitrate, respectively. The concentration of ammonia at  $t = 1-6$  h is marked as  $[\text{NH}_3]_t$ .

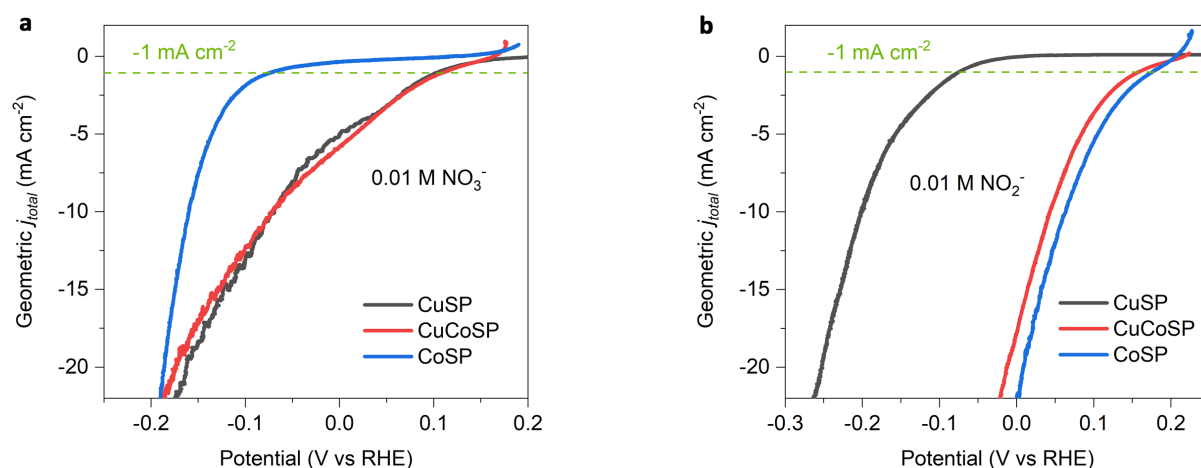

**Supplementary Fig. S20 | LSVs of the catalysts recorded at a scan rate of 1 mV s<sup>-1</sup>.** **a**, in 0.1 M KOH and 0.01 M NO<sub>3</sub><sup>-</sup>. **b**, in 0.1 M KOH and 0.01 M NO<sub>2</sub><sup>-</sup>. The potentials at -1 mA cm<sup>-2</sup> (a low current density with negligible mass transferring effects) were marked and used to compare the activities of the catalysts.

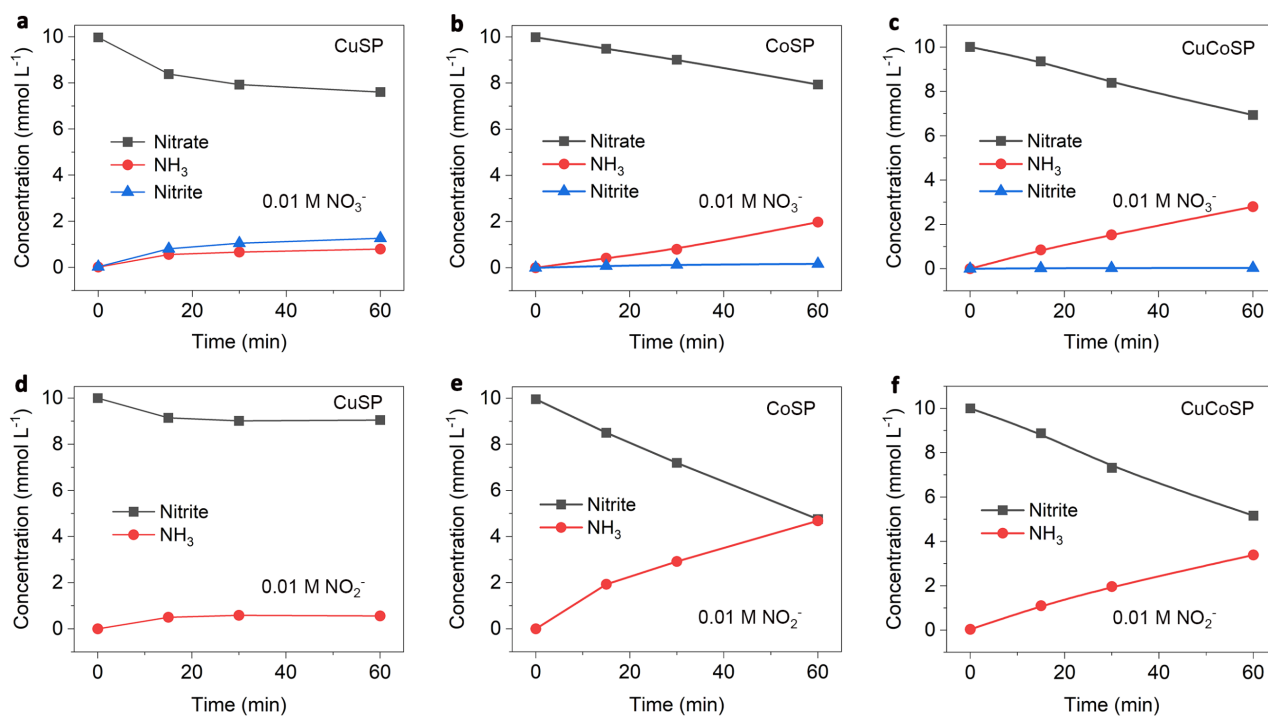

**Supplementary Fig. S21 | Concentration-evolving profiles of NO<sub>3</sub><sup>-</sup> and NO<sub>2</sub><sup>-</sup> ions at -0.175 V vs. RHE.** **a-c**, in 0.1 M KOH and 0.01 M NO<sub>3</sub><sup>-</sup> using CuSP (**a**), CoSP (**b**), and CuCoSP (**c**) as catalysts. The corresponding reduction products (NH<sub>3</sub> and NO<sub>2</sub><sup>-</sup>) at different electrolysis time were detected and marked. **d-f**, in 0.1 M KOH and 0.01 M NO<sub>2</sub><sup>-</sup> ions using CuSP (**d**), CoSP (**e**), and CuCoSP (**f**) as catalysts. The generated NH<sub>3</sub> at different electrolysis time was detected and marked.

As shown in (**a**), CuSP gradually deactivated during the NO<sub>3</sub><sup>-</sup> electrolysis, as supported by the chronoamperometry curves in supplementary Fig. S11. In contrast, as shown in (**d**), CuSP completely lost its activity for NO<sub>2</sub><sup>-</sup> reduction in 30 min. This finding indicates the dominant impact of NO<sub>2</sub><sup>-</sup>-reducing intermediates (e.g., \*NO) on the poisoning of CuSP, rather than that of the potential-dependent adsorbed hydrogen<sup>2</sup>, due to the same potential applied for NO<sub>3</sub><sup>-</sup> and NO<sub>2</sub><sup>-</sup> electrolysis.

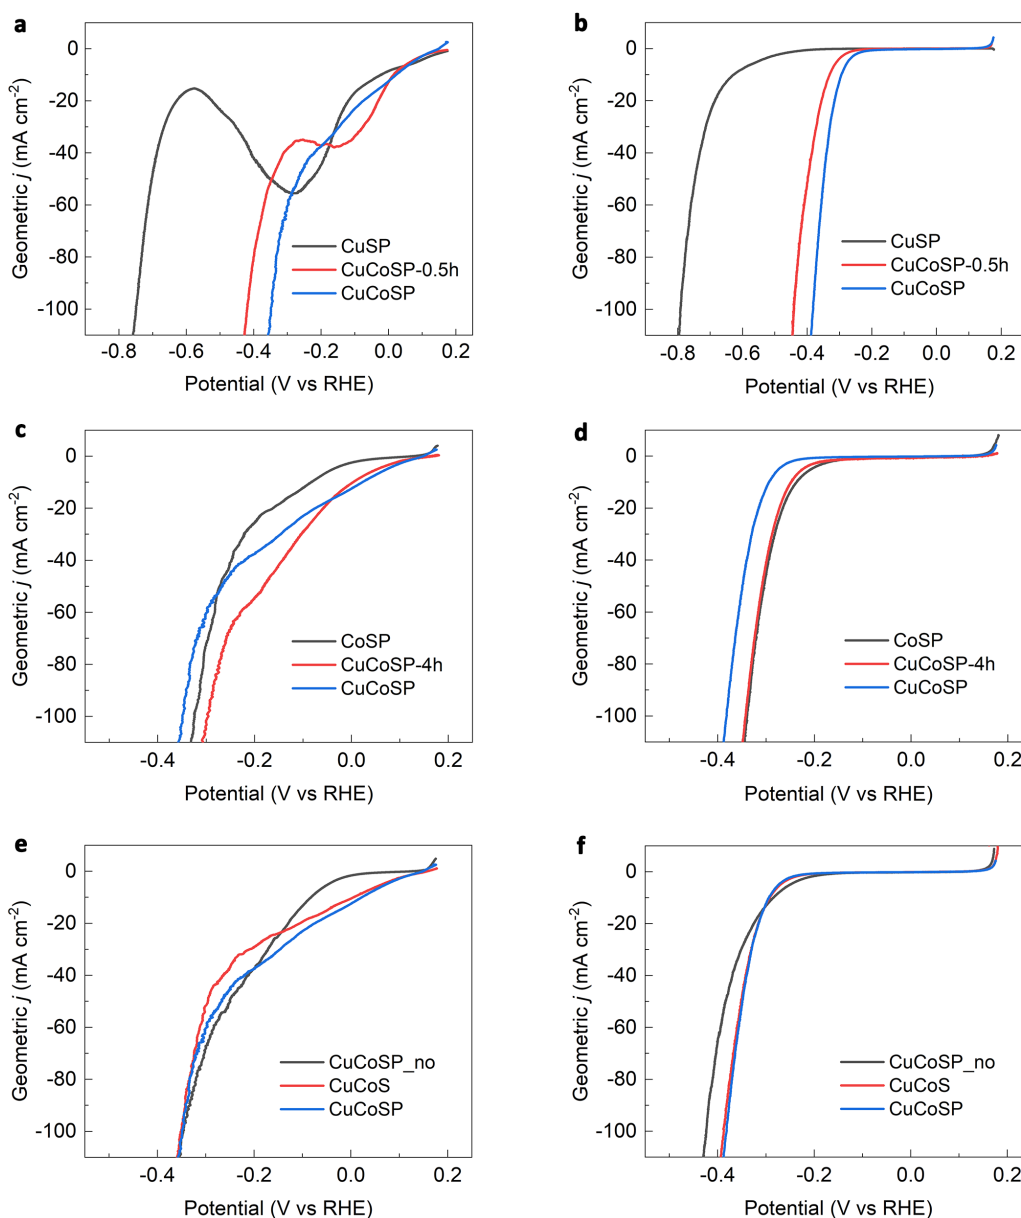

**Supplementary Fig. 22 | Comparison of the LSVs of the control samples and CuCoSP in 0.1 M KOH with and without 0.01 M  $\text{NO}_3^-$ .** **a, c, e**, Typical LSVs of the catalysts in 0.1 M KOH and 0.01 M  $\text{NO}_3^-$  and **b, d, f**, the corresponding LSV curves recorded in 0.1 M KOH. The LSVs were recorded at a scan rate of  $5 \text{ mV s}^{-1}$ .

In **(a)** and **(b)**, the CuCoSP-0.5h catalyst with a lower loading of Co-based phases on Cu foil substrate partly retains the catalytic features of CuSP for nitrate reduction but shows a remarkable enhancement of  $\text{H}_2$ -evolution reduction (HER) activity. Comparatively, in the presence of 0.01 M  $\text{NO}_3^-$  **(c)**, the CuCoSP-4h catalyst with a higher loading of Co-based phases shows a more negative potential than CuCoSP in the low-current region and much more positive potential in the high-current region. The former indicates that the high loading of Co-based phases blocks the active sites of Cu-based phases, while the latter corresponds to the improved HER activities of CuCoSP-4h, which are close to those of CoSP, as shown in **(d)**. In **(e)** and **(f)**, the CuCoSP\_no catalyst shows a poorer activity for  $\text{NO}_3^-$  reduction compared to CuCoSP, suggesting that the anionic ligands ( $\text{S}_2^-$  and  $\text{PO}_4^{3-}$ ) did not play a dominant role in the  $\text{NO}_3^-$  reduction processes. In **(e)**, although the CuCoS shows a little lower activity than the CuCoSP, the CuCoS and CuCoSP have almost the same selectivity and FE for  $\text{NH}_3$  production, as shown in supplementary **Fig. S11** and **Fig. S19**. Thus, the difference between CuCoS and CuCoSP in their activity should be from their different morphology. The nanorod morphology of CuCoSP contributes to achieving a higher activity for nitrate reduction.

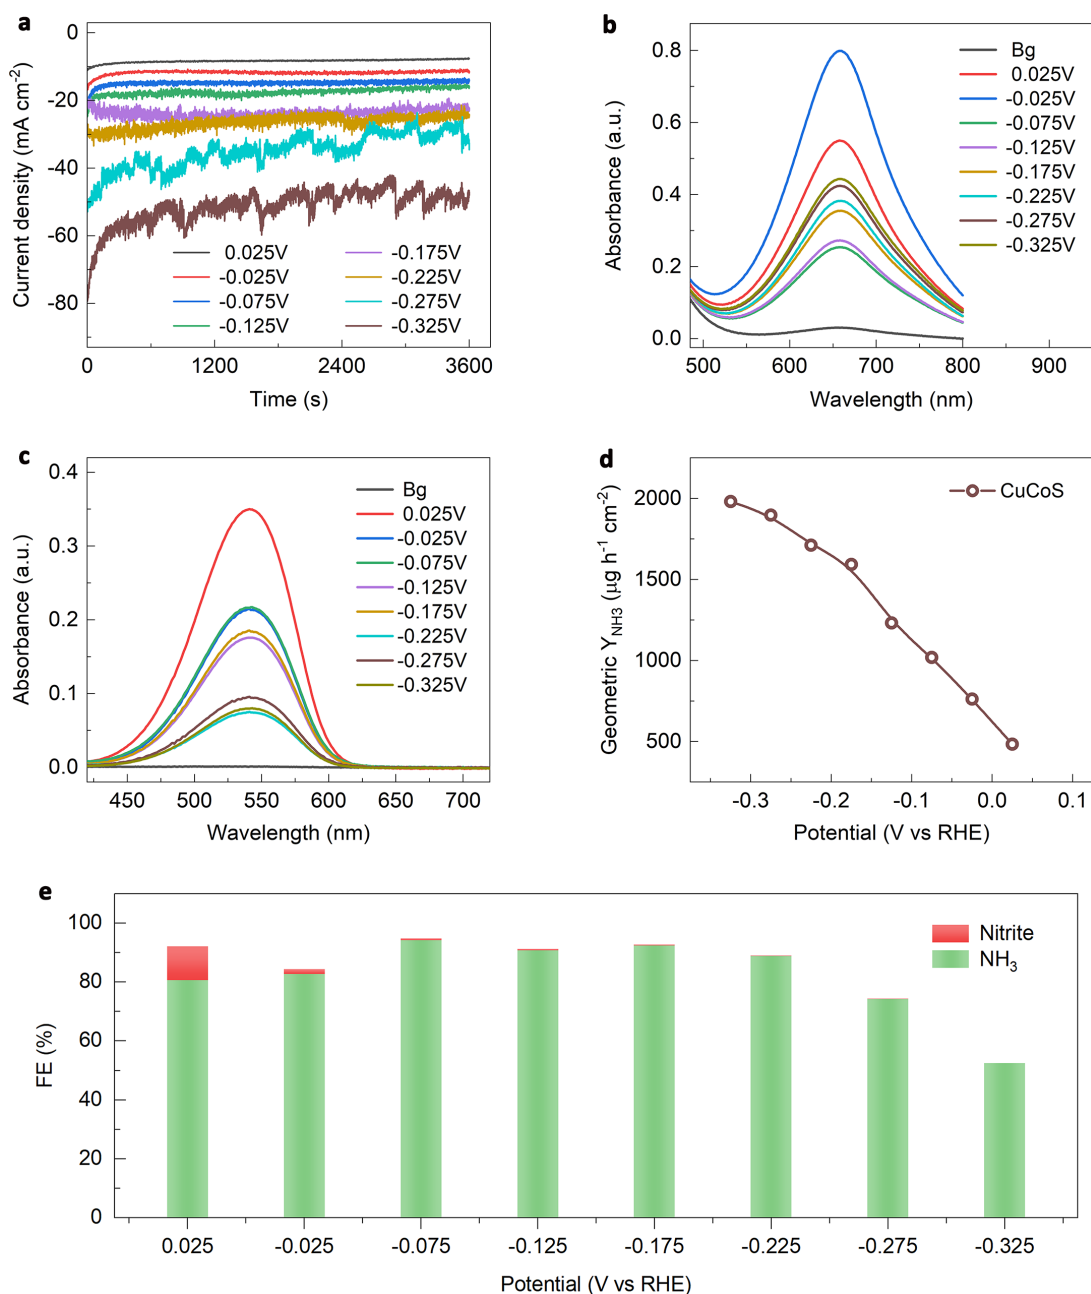

**Supplementary Fig. S23 | NH<sub>3</sub> synthesis performance of CuCoS at a series of potentials.** **a**, Chronoamperometry measurements at different potentials for 1 h in 0.1 M KOH and 0.01 M NO<sub>3</sub><sup>-</sup>. **b**, **c**, UV-vis absorption spectra of NH<sub>3</sub> (**b**) and NO<sub>2</sub><sup>-</sup> (**c**) measurements. Note that to detect the NH<sub>4</sub><sup>+</sup>, the post-electrolysis electrolytes at 0.025 V and -0.025 V were diluted 6 times, while the electrolytes obtained at the other electrolysis potentials were diluted 30 times. As for the NO<sub>2</sub><sup>-</sup> tests, the electrolytes obtained at all the electrolysis potentials were diluted 5 times. Background (Bg) signals were recorded using 0.1 M KOH. **d**, Y<sub>NH<sub>3</sub></sub> of CuCoS defined by the geometric area of electrodes. **e**, FE of NH<sub>3</sub> and NO<sub>2</sub><sup>-</sup>.

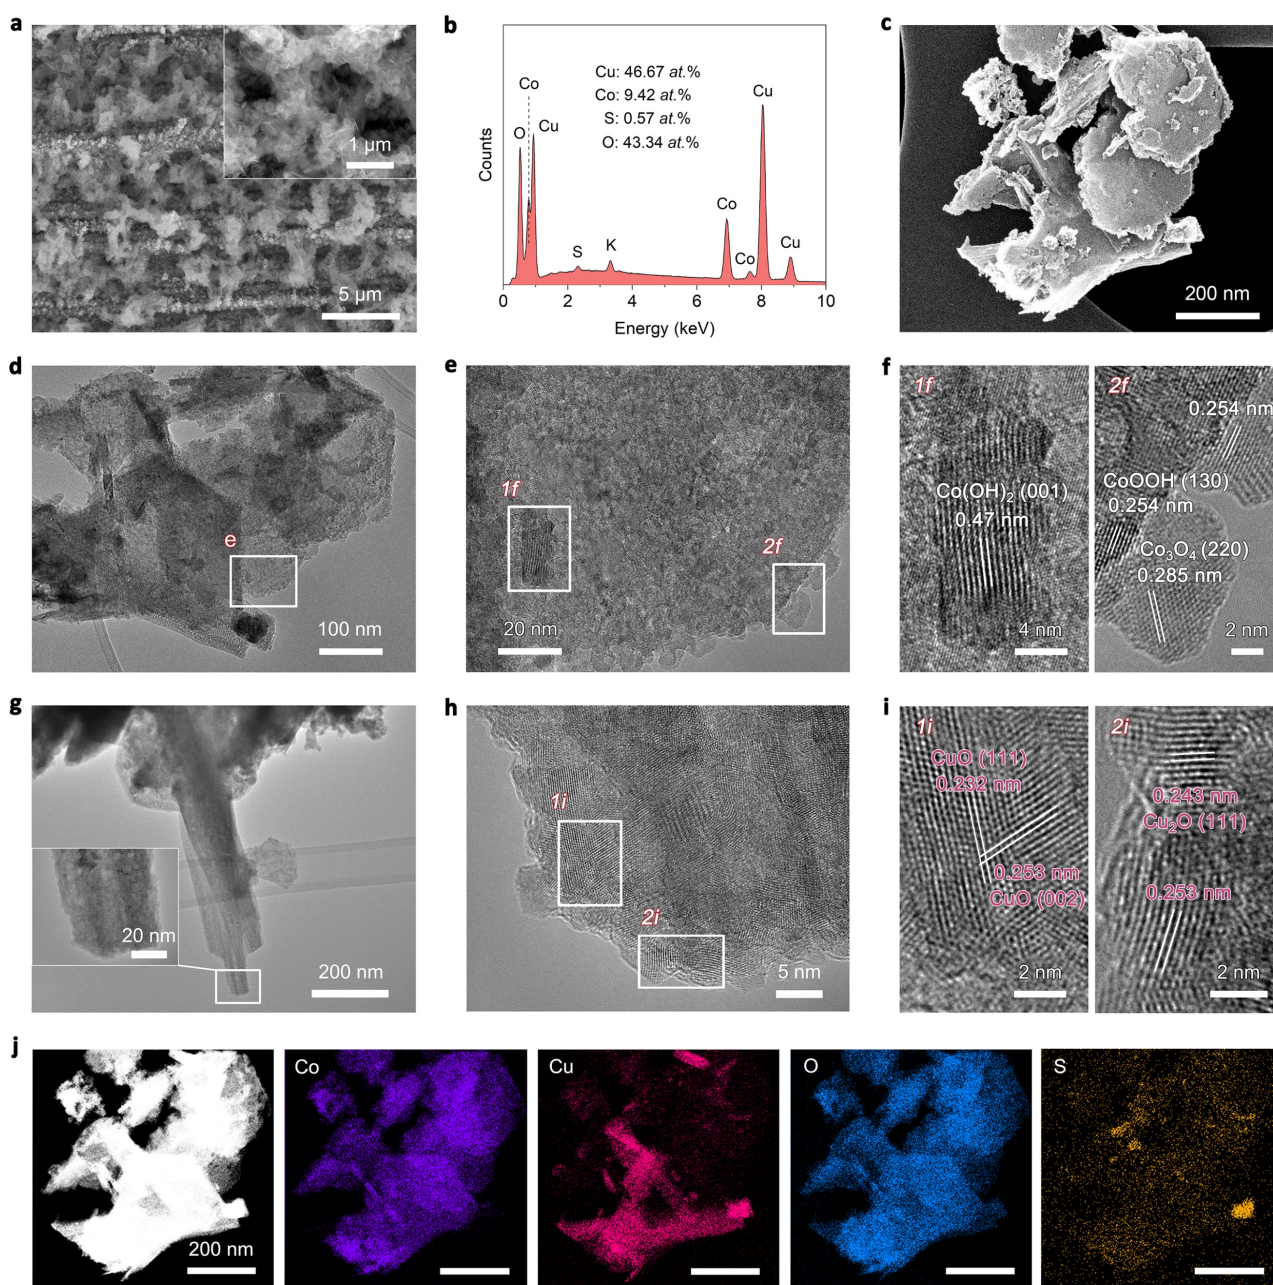

**Supplementary Fig. S24 | Characterizations of CuCoSP catalysts after repeating three electrolysis of one hour at  $-0.325$  V (vs. RHE) in  $0.1$  M KOH and  $0.01$  M  $\text{NO}_3^-$ .** **a, b**, A typical SEM image (**a**) and corresponding EDS patterns (**b**). **c, d**, A typical high-resolution SEM image (**c**) and corresponding TEM image (**d**). **e, f**, High-resolution TEM images of the marked region in (**d**) and (**e**). **g-i**, Typical TEM and HR-TEM images of the nanorod morphology. **j**, The corresponding high-angle annular dark-field (HAADF) TEM and EDS elemental mapping images.

The high-resolution SEM images, TEM images, and EDX mapping reveal that the Co-based phases are mainly distributed on the hexagon-shaped nanosheets, while the Cu-based phases mainly exist in the form of nanorods. This result suggests that continuous electrolysis indeed promotes the separation of Cu-based phases and Co-based phases in CuCoSP catalysts, rather than the formation of a bulk Cu-Co alloy catalyst (even if the electrolysis potential is at  $-0.325$  V). This phase-separation effect contributes to the formation of a tandem catalysis system.

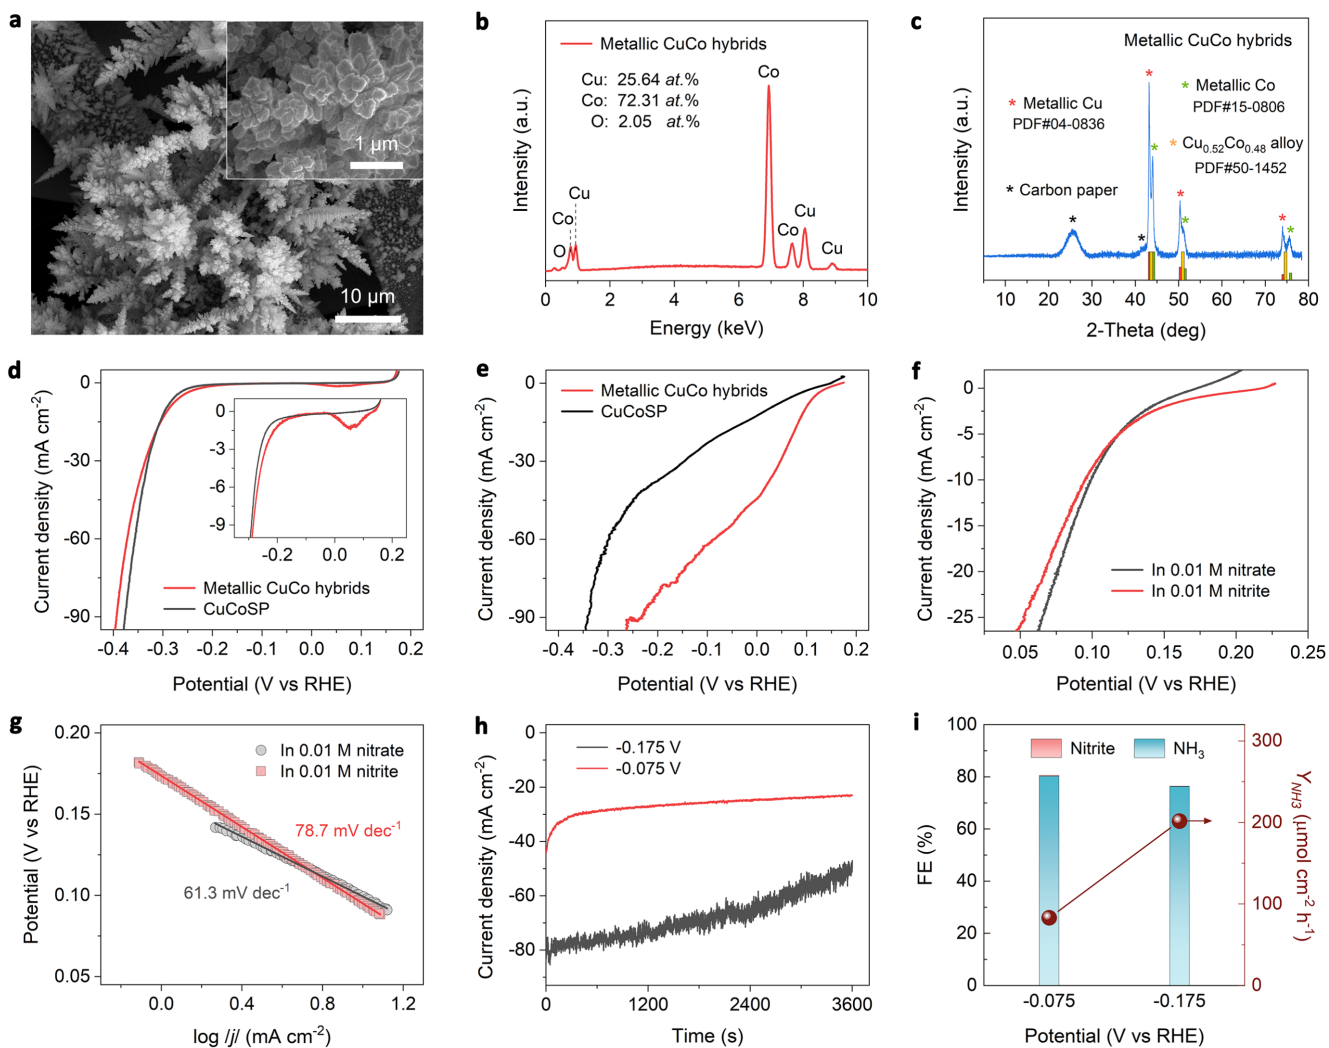

**Supplementary Fig. S25 | Characterizations and NO<sub>3</sub>RR activity of metallic CuCo hybrid catalysts.** **a**, SEM images of CuCo hybrids. **b**, EDX patterns. **c**, XRD patterns. **d**, **e**, LSV curves of CuCo hybrids in 0.1 M KOH (**d**) and 0.1 M KOH containing 0.01 M NO<sub>3</sub><sup>-</sup> (**e**), which were recorded at a scan rate of 5 mV s<sup>-1</sup>. **f**, **g**, LSV curves recorded at a scan rate of 1 mV s<sup>-1</sup> (**f**) and the derived Tafel slopes (**g**). **h**, **i**, Chronoamperometry curves (**h**) and the corresponding FE and Y<sub>NH<sub>3</sub></sub> at the tested potentials (**i**).



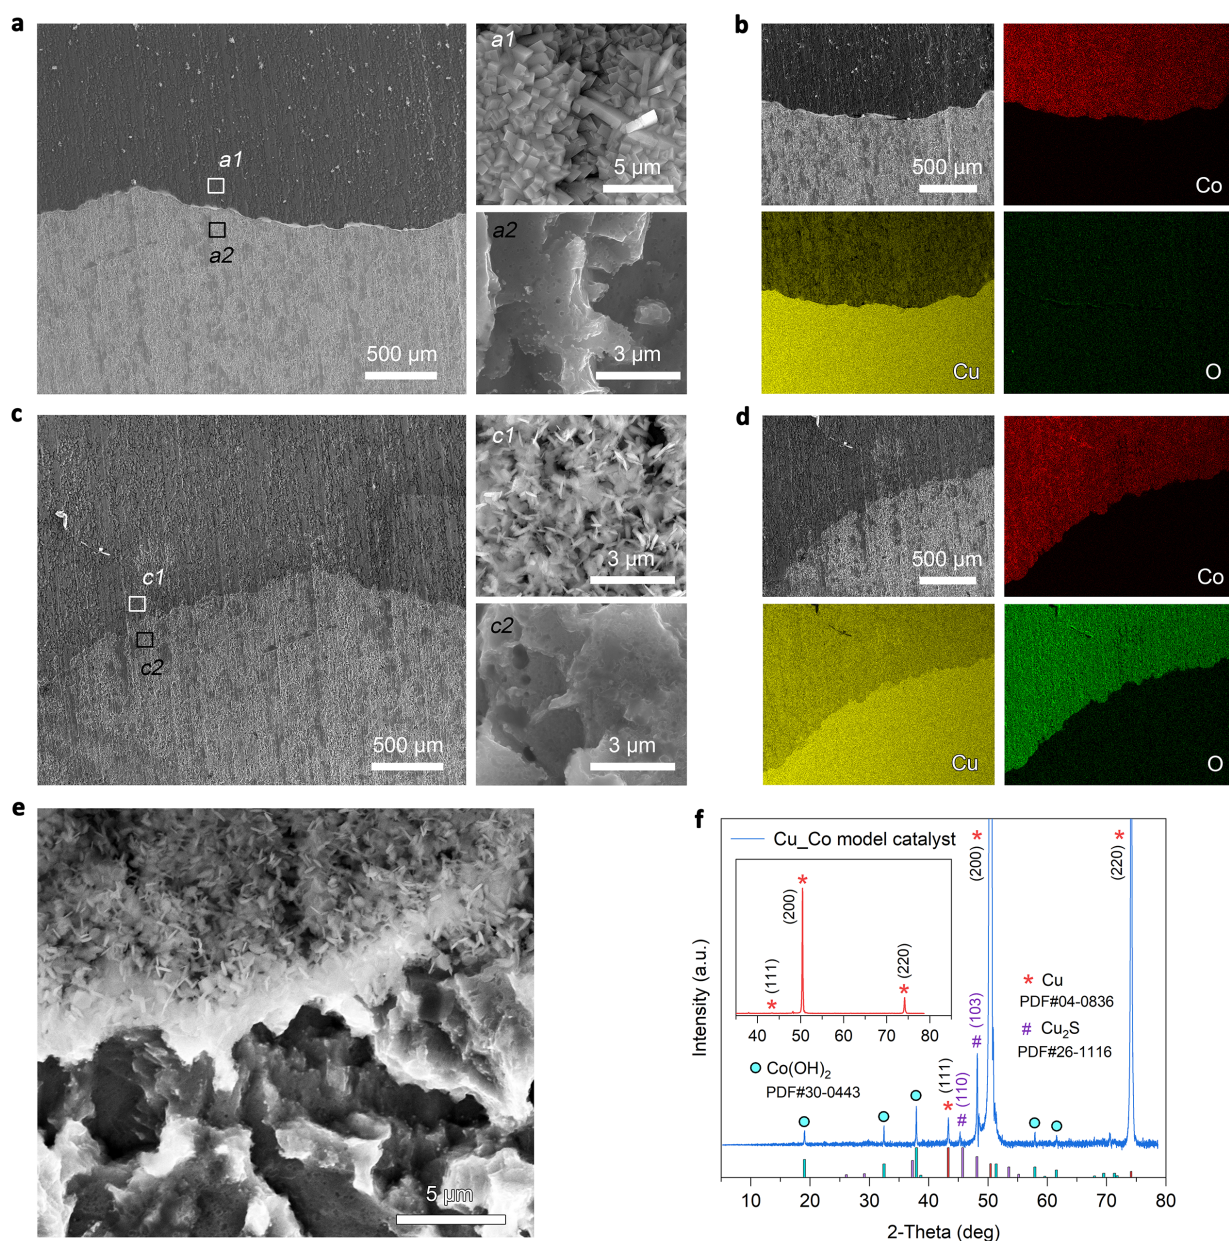

**Supplementary Fig. S26 | Characterizations of Cu<sub>2</sub>Co(OH)<sub>2</sub> model catalysts.** **a**, Typical SEM images of a Cu<sub>2</sub>ZIF(Co) precursor. **b**, EDX mapping of Cu, Co, and O in the Cu<sub>2</sub>ZIF(Co) precursor. **c**, Typical SEM images of the Cu<sub>2</sub>Co(OH)<sub>2</sub> model catalyst. **d**, EDX mapping of Cu, Co, and O in the Cu<sub>2</sub>Co(OH)<sub>2</sub> model catalyst. **e**, Typical SEM image at the border between the Cu and Co(OH)<sub>2</sub> layers. **f**, XRD patterns of the Cu<sub>2</sub>Co(OH)<sub>2</sub> model catalyst.

SEM images, EDX mapping and XRD patterns confirm that the Cu<sub>2</sub>Co(OH)<sub>2</sub> model catalyst consists of an isolated Cu layer and a Co(OH)<sub>2</sub> layer, as well as a well-defined border between the two layers, which can be used to simulate the roles of CuSP, CoSP, and CuCoSP, respectively. Note that a porous and rough Cu foil (prepared by HCl-etching CuSP as described in the experimental section) was used as the substrate for growth of ZIF(Co) MOF precursors and the preparation of Cu<sub>2</sub>Co(OH)<sub>2</sub> model catalyst, which is mainly due to the fast deactivation of the smooth Cu foil during the NO<sub>3</sub>RR as shown in supplementary Fig. S14. Thus, a porous and rough Cu substrate with relatively higher activity and stability for NO<sub>3</sub>RR was obtained which is more suitable for performing the subsequent SECM experiments and recording the activity map of NO<sub>2</sub><sup>-</sup> and NH<sub>3</sub> formation.

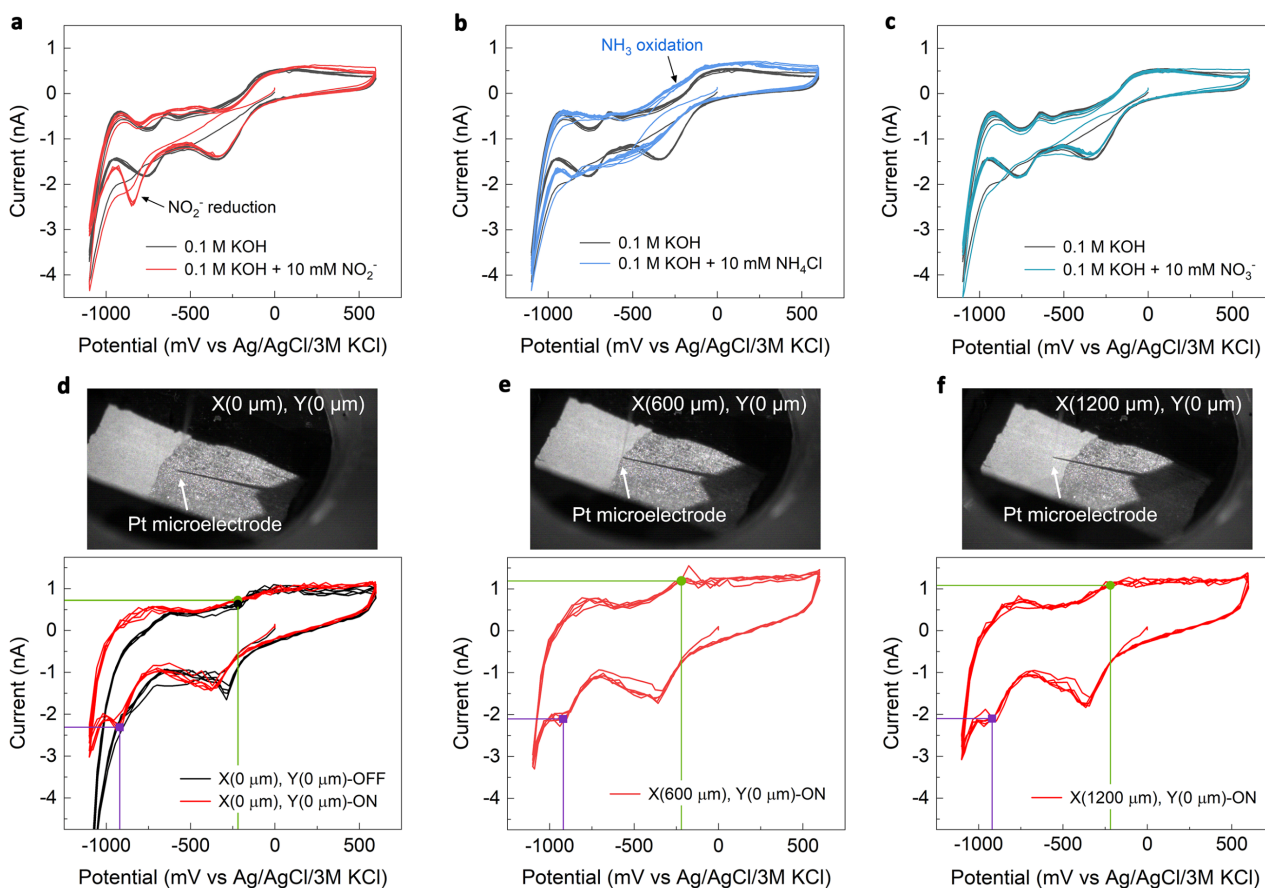

**Supplementary Fig. S27 | Electrochemical response of a Pt-ultramicroelectrode (Pt-UME).** **a**, CVs of Pt-UME in Ar-saturated 0.1 M KOH in presence and absence of 10 mM NO<sub>2</sub><sup>-</sup>. **b**, CVs of Pt-UME in Ar-saturated 0.1 M KOH in presence and absence of 10 mM NH<sub>4</sub>Cl. **c**, CVs of Pt-UME in Ar-saturated 0.1 M KOH in presence and absence of 10 mM NO<sub>3</sub><sup>-</sup>. **d-f**, Typical CVs of a Pt-UME recorded in the shear-force interaction region, where the Pt-UME is positioned <500 nm away from the surface of the Cu<sub>2</sub>Co(OH)<sub>2</sub> catalyst. When a potential of -0.12 V (vs. RHE) is applied at the Cu<sub>2</sub>Co(OH)<sub>2</sub> catalyst in 50 mM NO<sub>3</sub><sup>-</sup> at pH 13, the situation is marked 'ON'; when no potential is applied, it is marked 'OFF'.

To map the local in-situ generated concentration of NO<sub>2</sub><sup>-</sup> and NH<sub>3</sub> above the surface of the Cu<sub>2</sub>Co(OH)<sub>2</sub> catalyst (polarized at -0.12 V), the Pt-UME scans from the side of Cu layer to the side of Co(OH)<sub>2</sub> layer. The initial position of the Pt-UME above the Cu layer is marked as X (0 μm), Y (0 μm); the position of the border between the Cu layer and Co(OH)<sub>2</sub> layer is at about X (600 μm), Y (0 μm); the final position above the Co(OH)<sub>2</sub> layer is marked as X (1200 μm), Y (0 μm). The black point, green points, and purple points marked in (d-f) correspond to the selected potentials for identifying NH<sub>3</sub> oxidation (at 0.76 V vs RHE) and NO<sub>2</sub><sup>-</sup> reduction (at 0.06 V vs. RHE). The current at the corresponding potentials is used to derive the local concentrations of NH<sub>3</sub> and NO<sub>2</sub><sup>-</sup> generated on the Cu<sub>2</sub>Co(OH)<sub>2</sub> catalyst polarized at -0.12 V (vs RHE) in 50 mM NO<sub>3</sub><sup>-</sup> at pH 13. Note that the profile of CVs of the Pt-UME in the shear-force interaction region (d-f) is slightly different from those in the bulk of the electrolyte solution (a-c). This should be attributed to the impact of the microenvironment above the surface, e.g. the local pH value, adsorption of N-containing intermediates, or mass transport limitations, in the shear-force interaction region (<500 nm away from the surface of Cu<sub>2</sub>Co(OH)<sub>2</sub>). However, this does not compromise the identification of the NO<sub>2</sub><sup>-</sup> reduction and NH<sub>3</sub> oxidation signals.

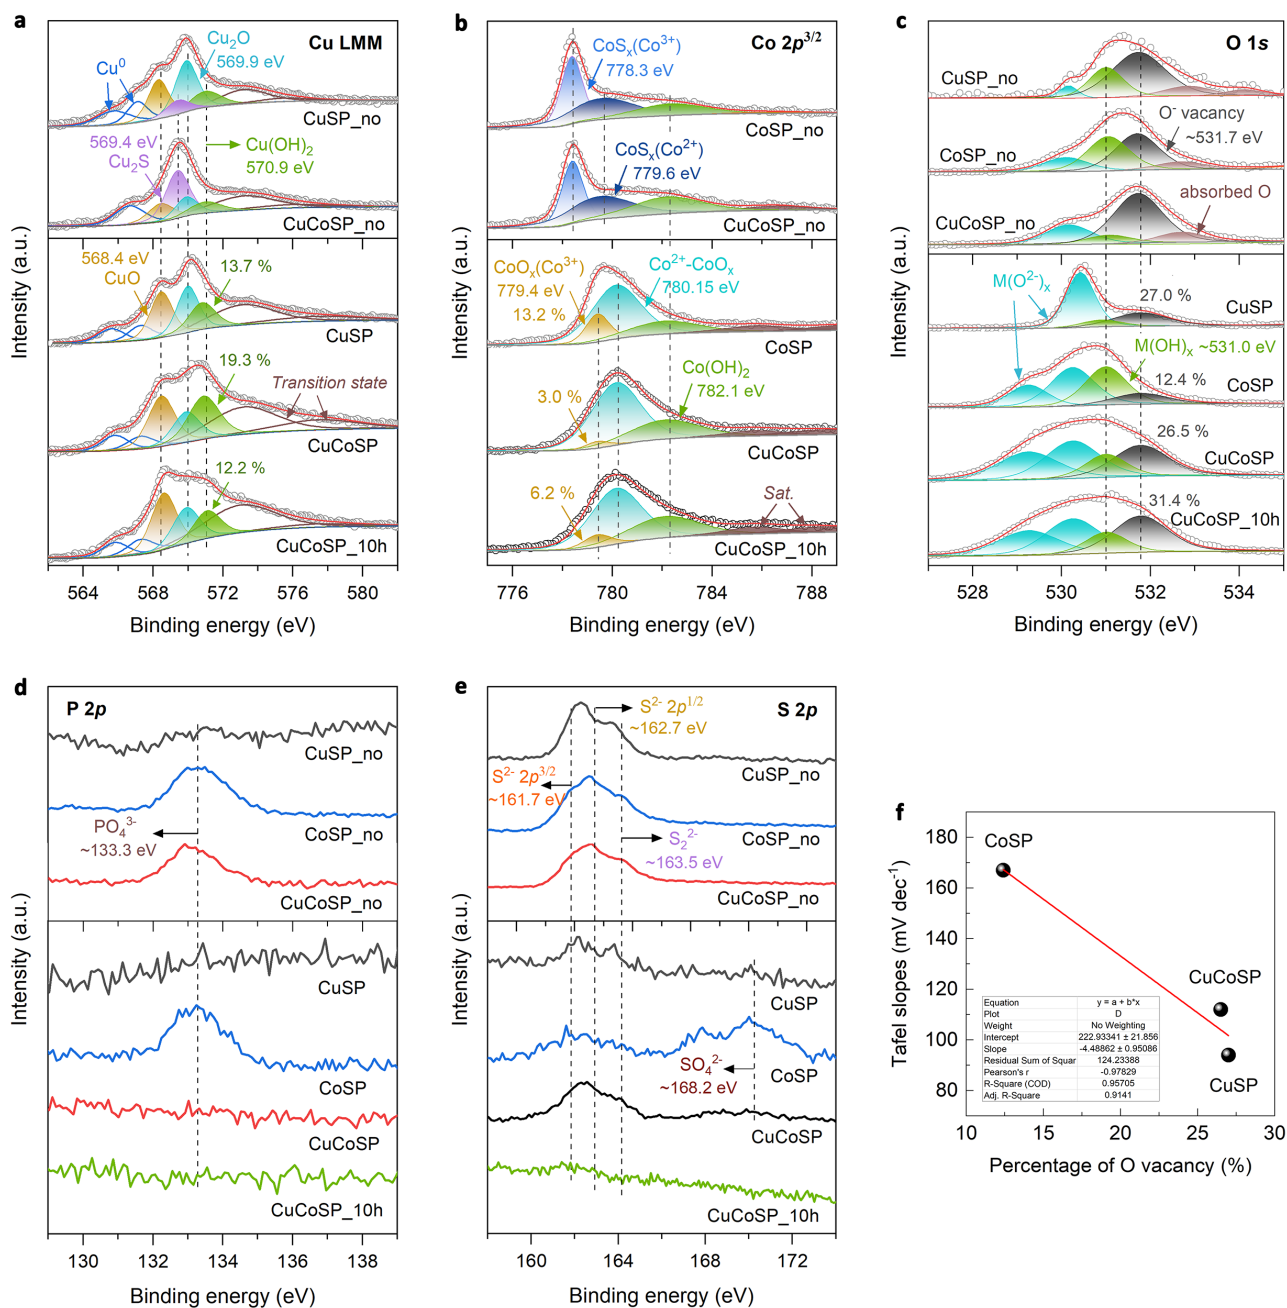

**Supplementary Fig. S28 | XPS spectra analysis of CuSP\_no, CuSP, CoSP\_no, CoSP, CuCoSP\_no, CuCoSP and CuCoSP\_10h (CuCoSP after stability tests for 10 h).** **a**, Cu LMM spectra and the fitted peaks. **b**, Co  $2p^{3/2}$  core-level spectra and the fitted peaks. **c**, O 1s core-level XPS spectra and the fitted peaks. **d**, P  $2p$  core-level spectra. **e**, S  $2p$  core-level spectra. **f**, Correlation of the Tafel slopes and the percentage of O vacancy for CoSP, CuCoSP, and CuSP. The results suggest that the initial Cu and Co metal sulfides (in CuSP\_no, CoSP\_no and CuCoSP\_no) were heavily oxidized and converted into corresponding Co/Cu-based oxides and hydroxides (in CuSP, CoSP and CuCoSP) after the electrochemical redox activation.

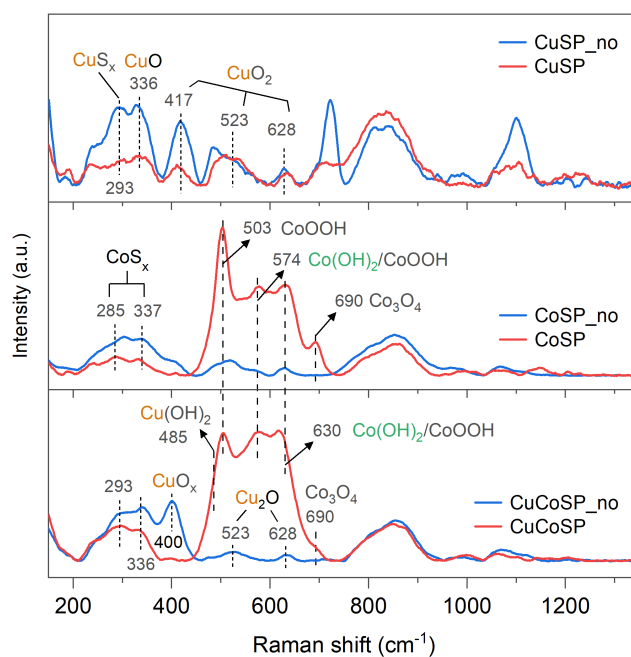

**Supplementary Fig. S29 | Ex-situ Raman analysis.** Ex-situ Raman spectra of CuSP\_no, CoSP\_no and CuCoSP\_no, as well as their corresponding products (CuSP, CoSP and CuCoSP) after the electrochemical redox activation.

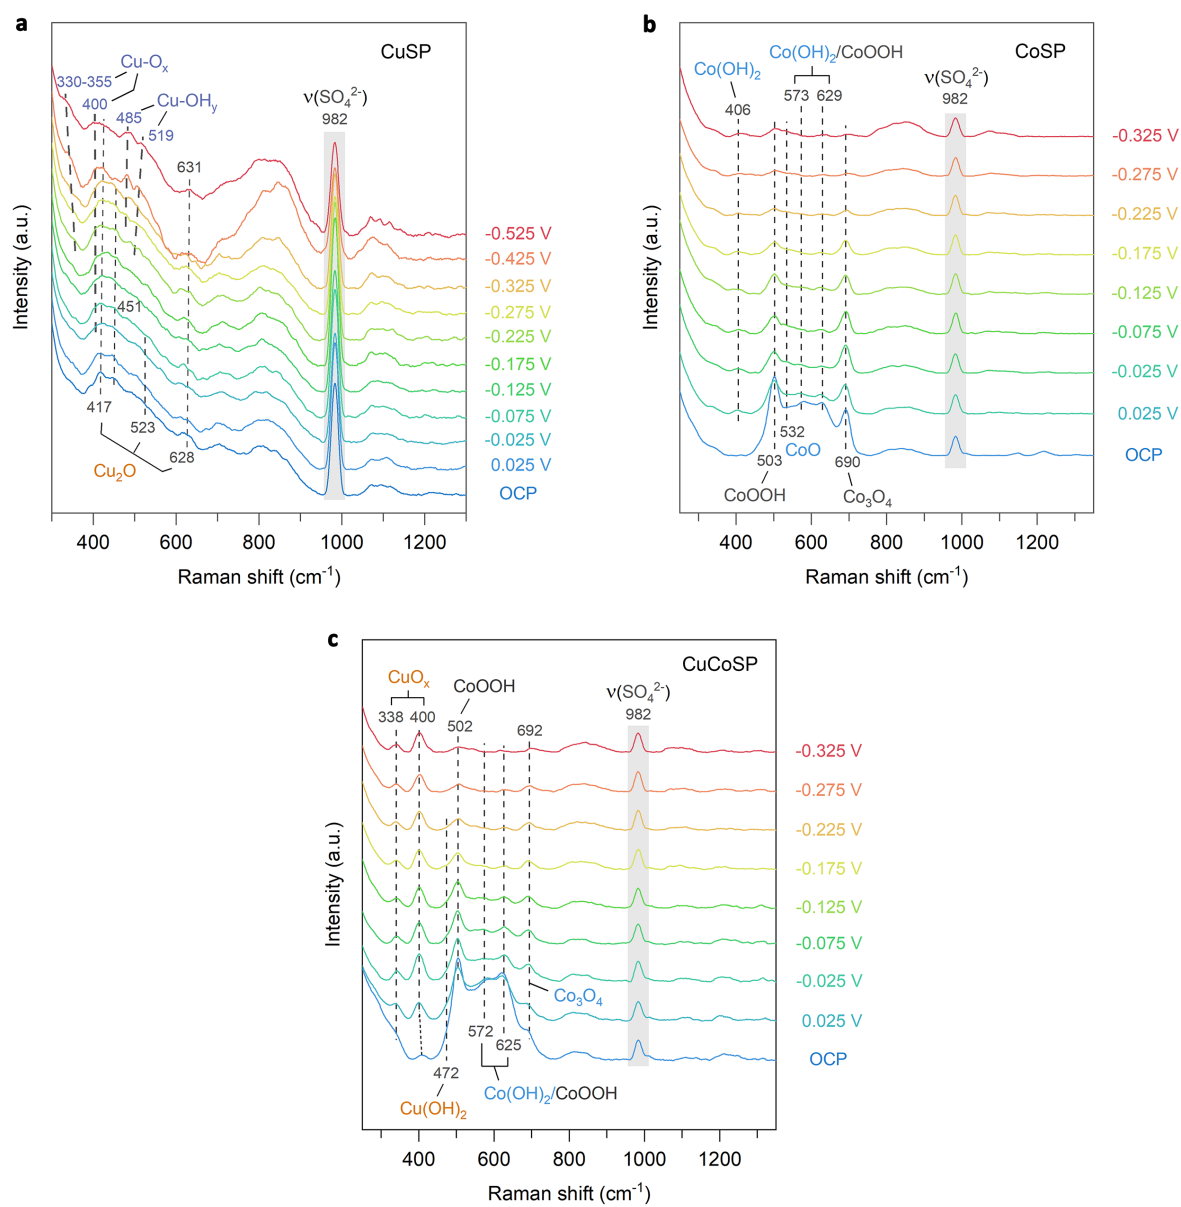

**Supplementary Fig. S30 | In-situ Raman spectra of the catalysts in 0.01 M KOH and 0.45 M  $\text{K}_2\text{SO}_4$  at a series of applied potentials. a, CuSP. b, CoSP. c, CuCoSP. The Raman spectra were recorded after applying a constant potential for 10 min.**

## Supplementary Notes

**Supplementary Note 1 | Assignment of XPS peaks.** Cu LMM XPS spectra (supplementary **Fig. S28a**) show the presence of multiple Cu-based phases, including Cu<sup>0</sup> (~567.3 eV) and (~565.5 eV), CuO (568.4 eV), Cu<sub>2</sub>S (569.4 eV), Cu<sub>2</sub>O (569.9 eV), Cu(OH)<sub>2</sub> (570.9 eV), and transition state peaks of LMM spectra (~573.3 eV) and ~577.5 eV) on the surface of CuSP\_no and CuCoSP\_no<sup>3-5</sup>, due to the surface oxidation of the two samples in Air. After redox activation, the signal of surface Cu<sub>2</sub>S phase disappeared, accompanied by the increase of the signals associated with Cu-based oxide and hydroxide phases. Compared to CuSP, the CuCoSP catalyst shows a ~1.4 times higher content of Cu(OH)<sub>2</sub> phase, implying that the relative ratio of Cu-based phases in CuCoSP is probably impacted by the coexistent Co-based phases. Remarkably, metallic Cu<sup>0</sup> exists in both CuSP and CuCoSP after the redox activation, contributing to the in-situ formation of a Cu/CuO<sub>x</sub> active phase for NO<sub>3</sub><sup>-</sup>-to-NO<sub>2</sub><sup>-</sup> conversion at a series of applied potentials.

Co 2p<sup>3/2</sup> XPS spectra in supplementary **Fig. S28b** show features characteristic of Co<sup>3+</sup> (778.3 eV) and Co<sup>2+</sup> (779.6 eV) of CoS<sub>x</sub> phase and a Co(OH)<sub>2</sub> phase (782.1 eV) in both CoSP\_no and CuCoSP\_no<sup>6,7</sup>. This result, together with that shown in supplementary **Fig. S28a**, suggest that the initial CuCoSP\_no precursor is mainly composed of Cu-Co binary metal sulfides, as further supported by the EDX spectra in supplementary **Fig. S1** and HR-TEM images and SAED patterns in **Fig. 1**, supplementary **Fig. S3** and **Fig. S4**. After redox activation, the CoS<sub>x</sub> phases in CoSP\_no and CuCoSP\_no precursors were heavily oxidized and converted to Co-based oxide (Co<sup>3+</sup> of CoO<sub>x</sub> at 779.4 eV and Co<sup>2+</sup> of CoO<sub>x</sub> at 780.15 eV) and hydroxide (782.1 eV) phase<sup>7-10</sup>. Remarkably, the content of Co<sup>3+</sup>-based phase in CuCoSP is ~4-fold lower than that in CoSP. Considering that the Co<sup>2+</sup>-based phases are identified as the active phase for NO<sub>2</sub><sup>-</sup> reduction to NH<sub>3</sub>, the lower content of Co<sup>3+</sup>-based phases in CuCoSP indicates that the active Co<sup>2+</sup>-based phases in CuCoSP might be stabilized by the coexistent Cu-based phases, which is critical for the observed high activity and selectivity of CuCoSP catalysts for tandem nitrate reduction.

According to the previous reports<sup>11</sup>, as shown in O 1s spectra (supplementary **Fig. S28c**), the oxygen species at a binding energy lower than 530.6 eV is assigned to the O<sup>2-</sup> in metal oxides, while the XPS peak at ~531 eV is from metal hydroxides. The XPS peak at ~531.7 eV is related to the O vacancies<sup>12,13</sup>, which allows compensation for some deficiencies in the subsurface of transition metal oxides. This oxygen vacancy species was previously described as “O<sup>-</sup>” species due to its high covalence bonding to the transition metal.

In P 2p spectra (supplementary **Fig. S28d**), the XPS peak at ~133.3 eV is from phosphate (PO<sub>4</sub><sup>3-</sup>) ions<sup>14</sup>. In particular, there is no detectable PO<sub>4</sub><sup>3-</sup> ions on CuSP and CuCoSP, suggesting that the PO<sub>4</sub><sup>3-</sup> ligands in CuSP\_no and CuCoSP\_no was desorbed after the redox activation. In supplementary **Fig. S28e**, the S 2p spectra reveal the presence of S<sup>2-</sup> (S<sup>2-</sup> 2p<sup>3/2</sup> at ~161.7 eV and S<sup>2-</sup> 2p<sup>1/2</sup> at ~162.7 eV) and S<sub>2</sub><sup>2-</sup> species (~163.5 eV) in CuSP\_no, CoSP\_no, and CuCoSP\_no<sup>6,7</sup>. The signals of these S species are sharply attenuated after the electrochemical redox activation, concomitant with an emergence of SO<sub>4</sub><sup>2-</sup> signals (at ~168.2 eV)<sup>7</sup>.

**Supplementary Note 2 | Assignment of Raman peaks.** According to the previous reports, the Raman spectra of the synthesized samples (supplementary **Fig. S29**) were carefully identified. As for CuSP\_no, the Raman peak at 293  $\text{cm}^{-1}$  is assigned to the  $\text{CuS}_x$  phase<sup>6</sup>, while that at 336  $\text{cm}^{-1}$  is related to  $\text{CuO}$ <sup>15,16</sup>. A set of Raman peaks at 417, 523 and 628  $\text{cm}^{-1}$  is a typical feature of  $\text{Cu}_2\text{O}$ <sup>15,16</sup>.

As for CoSP\_no and CoSP, the Raman peaks at  $\sim 285$  and  $\sim 337$   $\text{cm}^{-1}$  were previously assigned to the  $E_g$  and  $T_g$  modes of  $\text{CoS}_x$ <sup>6,17,18</sup>, while the Raman peaks at 503  $\text{cm}^{-1}$  and 690  $\text{cm}^{-1}$  correspond to the strongest Raman signals of  $\text{CoOOH}$  and  $\text{Co}_3\text{O}_4$ , respectively<sup>8</sup>. Besides, both  $\text{CoOOH}$  and  $\text{Co}(\text{OH})_2$  show characteristic board peaks at  $\sim 574$   $\text{cm}^{-1}$  and  $\sim 630$   $\text{cm}^{-1}$ <sup>19-21</sup>. The Raman peak of  $\text{CoO}$  at  $\sim 530$   $\text{cm}^{-1}$  could not be directly identified in the Raman spectra of CoSP\_no and CoSP due to the overlap of the peaks<sup>22</sup>.

The CuCoSP\_no basically shows the Raman features of both CuSP\_no and CoSP\_no. A new Raman peak emerges at  $\sim 400$   $\text{cm}^{-1}$  on CuCoSP\_no, which exists between the Raman signals of  $\text{CuO}$  at 336  $\text{cm}^{-1}$  and  $\text{Cu}_2\text{O}$  at 417  $\text{cm}^{-1}$ . Although the Raman signal at 417  $\text{cm}^{-1}$  associated with  $\text{Cu}_2\text{O}$  disappears on CuCoSP\_no, the other two signals at 523 and 628  $\text{cm}^{-1}$  are retained. Thus, we assign the signal of 400  $\text{cm}^{-1}$  to a mixed phase of  $\text{CuO}$  and  $\text{Cu}_2\text{O}$  ( $\text{CuO}_x$ ).

The signals associated with  $\text{CuS}_x$  and  $\text{CoS}_x$  phases are sharply attenuated in the CuSP, CoSP and CuCoSP catalysts, which further demonstrate the conversion of metal sulfide phases (in CuSP\_no, CoSP\_no and CuCoSP\_no) into corresponding metal oxide and hydroxide phases after the electrochemical redox activation.

## Supplementary Tables

**Supplementary Table S1 | Comparison of the NH<sub>3</sub> synthesis activity of the CuCoSP catalyst with other catalysts reported to date using nitrate as the nitrogen source under ambient conditions.** Error denotes the standard deviations of yield rate and Faradaic efficiency calculation from three independent samples.

| Catalysts                                                   | Electrolyte                                                                       | Potential (V vs. RHE)             | NH <sub>3</sub> yield rate                                               | Faradaic Efficiency (%) | Reference                              |
|-------------------------------------------------------------|-----------------------------------------------------------------------------------|-----------------------------------|--------------------------------------------------------------------------|-------------------------|----------------------------------------|
| CuSP on Cu foil                                             | 0.1 M KOH and 0.01 M NO <sub>3</sub> <sup>-</sup>                                 | -0.175                            | 540.7 ± 52.1 μg h <sup>-1</sup> cm <sup>-2</sup>                         | 55.7 ± 2.4              | This work                              |
| CoSP on carbon paper                                        | 0.1 M KOH and 0.01 M NO <sub>3</sub> <sup>-</sup>                                 | -0.175                            | 1713.0 ± 225.1 μg h <sup>-1</sup> cm <sup>-2</sup>                       | 73.2 ± 3.5              | This work                              |
| CuCoSP on Cu foil                                           | 0.1 M KOH and 0.01 M NO <sub>3</sub> <sup>-</sup>                                 | -0.175                            | 2576.6 ± 8.4 μg h <sup>-1</sup> cm <sup>-2</sup>                         | 92.8 ± 1.7              | This work                              |
|                                                             | 0.1 M KOH and 0.1 M NO <sub>3</sub> <sup>-</sup>                                  | -0.175                            | 1.17 mmol h <sup>-1</sup> cm <sup>-2</sup> or 250.41 mA cm <sup>-2</sup> | 90.6                    | This work                              |
| CuCoSP on Cu foil (average values of 10 h stability tests)  | 0.1 M KOH and 0.01 M NO <sub>3</sub> <sup>-</sup>                                 | -0.175                            | 2642.9 ± 104.7 μg h <sup>-1</sup> cm <sup>-2</sup>                       | 94.2 ± 1.7              | This work                              |
| PTCDA/O-Cu on carbon cloth                                  | 0.1 M PBS and 500 ppm NO <sub>3</sub> <sup>-</sup>                                | -0.4                              | 436 ± 85 μg h <sup>-1</sup> cm <sup>-2</sup>                             | 77 ± 3                  | H. Wang et al. <sup>23</sup>           |
| Cu/Cu <sub>2</sub> O NWAs on Cu mesh                        | 0.5 M Na <sub>2</sub> SO <sub>4</sub> and 200 ppm NO <sub>3</sub> <sup>-</sup>    | -0.85                             | 0.2449 mmol h <sup>-1</sup> cm <sup>-2</sup>                             | 81                      | B. Zhang et al. <sup>24</sup>          |
| CuNi alloy on Cu foam                                       | 1 M KOH and 0.1 M NO <sub>3</sub> <sup>-</sup>                                    | -0.1                              | NH <sub>3</sub> partial current density 90 mA cm <sup>-2</sup>           | ~95                     | Edward H. Sargent et al. <sup>25</sup> |
| Co/CoO NSAS on Ni foam                                      | 0.1 M Na <sub>2</sub> SO <sub>4</sub> and 200 ppm NO <sub>3</sub> <sup>-</sup>    | -1.3 V vs. SCE (~-0.64 V vs. RHE) | 194.46 μmol h <sup>-1</sup> cm <sup>-2</sup>                             | ~93.8                   | B Zhang et al. <sup>26</sup>           |
| Co <sub>3</sub> O <sub>4</sub> /Ti                          | 0.1 M Na <sub>2</sub> SO <sub>4</sub> and 100 ppm NO <sub>3</sub> <sup>-</sup>    | 10 mA cm <sup>-2</sup>            | NH <sub>3</sub> partial current density 6.5 mA cm <sup>-2</sup>          | 65                      | J. Jia et al. <sup>27</sup>            |
| Strained Ru nanoclusters on carbon paper                    | 1 M KOH and 1 M NO <sub>3</sub> <sup>-</sup>                                      | -0.2                              | 1.17 mmol h <sup>-1</sup> cm <sup>-2</sup>                               | ~100                    | L. Zhang et al. <sup>28</sup>          |
| TiO <sub>2</sub> nanotubes with oxygen vacancies on Ti foil | 0.5 M Na <sub>2</sub> SO <sub>4</sub> and 50-200 ppm NO <sub>3</sub> <sup>-</sup> | -1.3 V vs. SCE (~-0.94 V vs. RHE) | 0.045 mmol h <sup>-1</sup> mg <sup>-1</sup>                              | 95.2                    | B. Zhang et al. <sup>29</sup>          |
| Ti foil                                                     | 0.4 M NO <sub>3</sub> <sup>-</sup> at pH = ~0.77                                  | -1.0                              | NH <sub>3</sub> partial current density 22 mA cm <sup>-2</sup>           | 82                      | W. Ma et al. <sup>30</sup>             |
| NiAlMnCoCu alloy on Ni foam                                 | 0.5 M KOH and 0.25 M NO <sub>3</sub> <sup>-</sup>                                 | -1.2 vs. SCE (~-0.15 V vs. RHE)   | -----                                                                    | 89.4                    | Q. Liu et al. <sup>31</sup>            |



**Supplementary Table S2 | Reaction kinetic parameters of the CuCoSP catalyst and controls for NO<sub>3</sub><sup>-</sup> and NO<sub>2</sub><sup>-</sup> reduction under ambient conditions.** Error denotes the standard deviations of reaction constant calculation from three sampling time (15 min, 30 min and 60 min), as shown in supplementary Fig. 20.

| Catalysts | Electrolytes                                    | Potential @ -1 mA cm <sup>-2</sup> (mV vs. RHE) | Reaction constant (k) (min <sup>-1</sup> ) at -0.175 V (vs. RHE) | Tafel slopes (mV dec <sup>-1</sup> ) | <i>j</i> <sub>NH<sub>3</sub></sub> (mA cm <sup>-2</sup> ) at -0.175 V (vs. RHE) |
|-----------|-------------------------------------------------|-------------------------------------------------|------------------------------------------------------------------|--------------------------------------|---------------------------------------------------------------------------------|
| CuSP      | 0.1 M KOH + 0.01 M NO <sub>3</sub> <sup>-</sup> | 105.24                                          | $K_1 = (8.6 \pm 3.84) \times 10^{-3}$                            | 94                                   | -7.74                                                                           |
|           | 0.1 M KOH + 0.01 M NO <sub>2</sub> <sup>-</sup> | -74.75                                          | $K_2 = (4.01 \pm 2.35) \times 10^{-3}$                           | 72                                   | -----                                                                           |
| CoSP      | 0.1 M KOH + 0.01 M NO <sub>3</sub> <sup>-</sup> | -70.95                                          | $K_1 = (3.87 \pm 0.25) \times 10^{-3}$                           | 167                                  | -19.95                                                                          |
|           | 0.1 M KOH + 0.01 M NO <sub>2</sub> <sup>-</sup> | 176.24                                          | $K_2 = (12.19 \pm 1.03) \times 10^{-3}$                          | 106                                  | -----                                                                           |
| CuCoSP    | 0.1 M KOH + 0.01 M NO <sub>3</sub> <sup>-</sup> | 111.44                                          | $K_1 = (5.97 \pm 0.95) \times 10^{-3}$                           | 112                                  | -33.15                                                                          |
|           | 0.1 M KOH + 0.01 M NO <sub>2</sub> <sup>-</sup> | 158.24                                          | $K_2 = (10.63 \pm 1.78) \times 10^{-3}$                          | 101                                  | -----                                                                           |

During the NO<sub>3</sub><sup>-</sup> electroreduction over CoSP and CuCoSP, the local surface NO<sub>2</sub><sup>-</sup> concentration formed on CoSP and CuCoSP can be apparently reflected by their *k*<sub>1</sub> values. A larger *k*<sub>1</sub> value means a higher reduction rate of NO<sub>3</sub><sup>-</sup> to NO<sub>2</sub><sup>-</sup>, thus corresponding to a higher local surface NO<sub>2</sub><sup>-</sup> concentration. As such, the relative ratio of the local surface NO<sub>2</sub><sup>-</sup> concentration on CoSP and on CuCoSP can be estimated as: *k*<sub>1</sub> (CoSP): *k*<sub>1</sub> (CuCoSP) = 5.97: 3.87 = 1.54: 1.

## References

- Su, J. F., Ruzybayev, I., Shah, I. & Huang, C. P. The electrochemical reduction of nitrate over micro-architected metal electrodes with stainless steel scaffold. *Appl. Catal. B: Environ.* **180**, 199–209 (2016).
- Pérez-Gallent, E., Figueiredo, M. C., Katsounaros, I. & Koper, M. T. M. Electrocatalytic reduction of Nitrate on Copper single crystals in acidic and alkaline solutions. *Electrochim. Acta* **227**, 77–84 (2017).
- Krylova, V. & Andrulevičius, M. Optical, XPS and XRD Studies of Semiconducting Copper Sulfide Layers on a Polyamide Film. *Int. J. Photoenergy* **2009**, 304308 (2009).
- Platzman, I., Saguy, C., Brener, R., Tannenbaum, R. & Haick, H. Formation of Ultrasoft and Highly Stable Copper Surfaces through Annealing and Self-Assembly of Organic Monolayers. *Langmuir* **26**, 191–201 (2010).
- Platzman, I., Brener, R., Haick, H. & Tannenbaum, R. Oxidation of Polycrystalline Copper Thin Films at Ambient Conditions. *J. Phys. Chem. C* **112**, 1101–1108 (2008).
- He, W., Liberman, I., Rozenberg, I., Ifraemov, R. & Hod, I. Electrochemically Driven Cation Exchange Enables the Rational Design of Active CO<sub>2</sub> Reduction Electrocatalysts. *Angew. Chem. Int. Ed.* **59**, 8262–8269 (2020).
- He, W., Ifraemov, R., Raslin, A. & Hod, I. Room-Temperature Electrochemical Conversion of Metal-Organic Frameworks into Porous Amorphous Metal Sulfides with Tailored Composition and Hydrogen Evolution Activity. *Adv. Funct. Mater.* **28**, 1707244 (2018).
- Yang, J., Liu, H., Martens, W. N. & Frost, R. L. Synthesis and Characterization of Cobalt Hydroxide, Cobalt Oxyhydroxide, and Cobalt Oxide Nanodiscs. *J. Phys. Chem. C* **114**, 111–119 (2010).
- McIntyre, N. S. & Cook, M. G. X-ray photoelectron studies on some oxides and hydroxides of cobalt, nickel, and copper. *Anal. Chem.* **47**, 2208–2213 (1975).
- Dou, S. *et al.* Atomic-Scale CoO<sub>x</sub> Species in Metal-Organic Frameworks for Oxygen Evolution Reaction. *Adv. Funct. Mater.* **27**, 1702546 (2017).
- Dupin, J.-C., Gonbeau, D., Vinatier, P. & Levasseur, A. Systematic XPS studies of metal oxides, hydroxides and peroxides. *Phys. Chem. Chem. Phys.* **2**, 1319–1324 (2000).

12. Xu, L. *et al.* Plasma-Engraved Co<sub>3</sub>O<sub>4</sub> Nanosheets with Oxygen Vacancies and High Surface Area for the Oxygen Evolution Reaction. *Angew. Chem. Int. Ed.* **55**, 5277–5281 (2016).
13. Wang, Z. *et al.* Identifying Copper Vacancies and Their Role in the CuO Based Photocathode for Water Splitting. *Angew. Chem. Int. Ed.* **58**, 17604–17609 (2019).
14. Cobo, S. *et al.* A Janus cobalt-based catalytic material for electro-splitting of water. *Nat. Mater.* **11**, 802–807 (2012).
15. Deng, Y., Handoko, A. D., Du, Y., Xi, S. & Yeo, B. S. In Situ Raman Spectroscopy of Copper and Copper Oxide Surfaces during Electrochemical Oxygen Evolution Reaction: Identification of Cu<sup>III</sup> Oxides as Catalytically Active Species. *ACS Catal.* **6**, 2473–2481 (2016).
16. Zhao, Y. *et al.* Speciation of Cu Surfaces During the Electrochemical CO Reduction Reaction. *J. Am. Chem. Soc.* **142**, 9735–9743 (2020).
17. Chen, C.-J. *et al.* An integrated cobalt disulfide (CoS<sub>2</sub>) co-catalyst passivation layer on silicon microwires for photoelectrochemical hydrogen evolution. *J. Mater. Chem. A* **3**, 23466–23476 (2015).
18. Givalou, L. *et al.* Electrodeposited cobalt-copper sulfide counter electrodes for highly efficient quantum dot sensitized solar cells. *Electrochim. Acta* **210**, 630–638 (2016).
19. Koza, J. A., Hull, C. M., Liu, Y.-C. & Switzer, J. A. Deposition of β-Co(OH)<sub>2</sub> Films by Electrochemical Reduction of Tris(ethylenediamine)cobalt(III) in Alkaline Solution. *Chem. Mater.* **25**, 1922–1926 (2013).
20. Liu, Y.-C., Koza, J. A. & Switzer, J. A. Conversion of electrodeposited Co(OH)<sub>2</sub> to CoOOH and Co<sub>3</sub>O<sub>4</sub>, and comparison of their catalytic activity for the oxygen evolution reaction. *Electrochim. Acta* **140**, 359–365 (2014).
21. Gao, Y. Q., Li, H. B. & Yang, G. W. Amorphous Co(OH)<sub>2</sub> nanosheet electrocatalyst and the physical mechanism for its high activity and long-term cycle stability. *J. Appl. Phys.* **119**, 034902 (2016).
22. Rivas-Murias, B. & Salgueiriño, V. Thermodynamic CoO–Co<sub>3</sub>O<sub>4</sub> crossover using Raman spectroscopy in magnetic octahedron-shaped nanocrystals. *J. Raman Spectrosc.* **48**, 837–841 (2017).
23. Chen, G.-F. *et al.* Electrochemical reduction of nitrate to ammonia via direct eight-electron transfer using a copper-molecular solid catalyst. *Nat. Energy* **5**, 605–613 (2020).
24. Wang, Y., Zhou, W., Jia, R., Yu, Y. & Zhang, B. Unveiling the Activity Origin of a Copper-based Electrocatalyst for Selective Nitrate Reduction to Ammonia. *Angew. Chem. Int. Ed.* **59**, 5350–5354 (2020).
25. Wang, Y. *et al.* Enhanced Nitrate-to-Ammonia Activity on Copper-Nickel Alloys via Tuning of Intermediate Adsorption. *J. Am. Chem. Soc.* **142**, 5702–5708 (2020).
26. Yu, Y., Wang, C., Yu, Y., Wang, Y. & Zhang, B. Promoting selective electroreduction of nitrates to ammonia over electron-deficient Co modulated by rectifying Schottky contacts. *Sci. China Chem.* **63**, 1469–1476 (2020).
27. Su, L. *et al.* Electrochemical nitrate reduction by using a novel Co<sub>3</sub>O<sub>4</sub>/Ti cathode. *Water Res.* **120**, 1–11 (2017).
28. Li, J. *et al.* Efficient Ammonia Electrosynthesis from Nitrate on Strained Ruthenium Nanoclusters. *J. Am. Chem. Soc.* **142**, 7036–7046 (2020).
29. Jia, R. *et al.* Boosting Selective Nitrate Electroreduction to Ammonium by Constructing Oxygen Vacancies in TiO<sub>2</sub>. *ACS Catal.* **10**, 3533–3540 (2020).
30. McEnaney, J. M. *et al.* Electrolyte Engineering for Efficient Electrochemical Nitrate Reduction to Ammonia on a Titanium Electrode. *ACS Sustain. Chem. Eng.* **8**, 2672–2681 (2020).
31. Lu, C., Lu, S., Qiu, W. & Liu, Q. Electroreduction of nitrate to ammonia in alkaline solutions using hydrogen storage alloy cathodes. *Electrochim. Acta* **44**, 2193–2197 (1999).
